# Supplementary material for: Dose-response Relationships Between Cigarette Smoking and Breast Cancer Risk: A Systematic Review and Meta-analysis
Source: PubMed Central journal article supplement (PMC10635814; doi:10.2188/jea.je20220206), 2023-12-05
Supplement: je-33-640-s001.pdf [file je-33-640-s001.pdf]

| Description of Tables or Figure                                                                                                                                                                                                                                      | Page |
|----------------------------------------------------------------------------------------------------------------------------------------------------------------------------------------------------------------------------------------------------------------------|------|
| <b>eTable 1.</b> List of 43 eligible publications excluded from the meta-analysis and corresponding reason for exclusion.                                                                                                                                            | 2    |
| <b>eTable 2.</b> Main characteristics of the 115 case-control studies on the association between cigarette smoking and breast cancer risk included in the review, and corresponding information contributing to the meta-analysis.                                   | 4    |
| <b>eTable 3.</b> Main characteristics of the 54 cohort studies on the association between cigarette smoking and breast cancer risk included in the review, and corresponding information contributing to the meta-analysis.                                          | 10   |
| <b>eTable 4.</b> List of publications for which data have been partially excluded from the meta-analysis and reason for exclusion.                                                                                                                                   | 14   |
| <b>eFigure 1.</b> Flowchart for the selection of the original studies on the association between cigarette smoking and breast cancer risk included in the review and meta-analysis.                                                                                  | 15   |
| <b>eFigure 2.</b> Forest plot of study-specific and pooled relative risk (RR) of breast cancer for ever cigarette smokers (ES) versus never smokers (NS).                                                                                                            | 16   |
| <b>eFigure 3.</b> Forest plot of study-specific and pooled relative risk (RR) of breast cancer for ever cigarette smokers (ES) versus never smokers (NS) in women with selected genetic factors.                                                                     | 18   |
| <b>eFigure 4.</b> Funnel plot of studies on the association between current (panel A), former (panel B), and ever (panel C) cigarette smokers versus never smokers and breast cancer risk.                                                                           | 19   |
| <b>eMaterial 1.</b> Literature search strings for the update of the last available comprehensive review used in PubMed/MEDLINE and Embase.                                                                                                                           | 20   |
| <b>eMaterial 2.</b> Functions of the linear models used to estimate the associations between smoking intensity (current vs. never smokers), duration (current vs. never smokers) and time since quitting (former vs. current smokers) and the risk of breast cancer. | 21   |
| <b>References</b>                                                                                                                                                                                                                                                    | 22   |

**eTable 1.** List of 43 eligible publications excluded from the meta-analysis and corresponding reason for exclusion

| First Author, year             | Study design | Reason of exclusion                                              |
|--------------------------------|--------------|------------------------------------------------------------------|
| Akinyemiju, 2017 [1]           | CO           | Included in Ordonez-Mena, 2016 [2]                               |
| Ambrosone, 1996 [3]            | CC           | Included in Ambrosone, 2008 [4]                                  |
| Bjerkaas, 2015 [5]             | CO           | Included in Bjerkaas, 2013 [6]                                   |
| Breast Cancer Family, 2008 [7] | CC           | Included in Li, 2020 [8] and Zeinomar, 2019 [9]                  |
| Britton, 2002 [10]             | CC           | Included in Gammon, 1998 [11]                                    |
| Butler, 2016 [12]              | CC           | Included in Mechanic, 2006 [13]                                  |
| Chang-Claude, 2002 [14]        | CC           | Included in Ambrosone, 2008 [4]                                  |
| Cox, 2011 [15]                 | PCC          | Singles cohorts already included with more information available |
| Cui, 2006 [16]                 | CO           | Included in Catsburg, 2015 [17]                                  |
| Dianatinasab, 2017 [18]        | CC           | Included in Dianatinasab, 2019 [19]                              |
| Duell, 2001 [20]               | CC           | Included in Mechanic, 2006 [13]                                  |
| Egan, 2002 [21]                | CO           | Included in Xue, 2011 [22]                                       |
| Egan, 2003 [23]                | CC           | Included in Ambrosone, 2008 [4]                                  |
| Ewertz, 1993 [24]              | CC           | Included in Ewertz, 1990 [25]                                    |
| Fararouei, 2019 [26]           | CC           | Included in Dianatinasab, 2019 [19]                              |
| Garcia-Closas, 1999 [27]       | NCC          | Included in Xue, 2011 [22]                                       |
| Ghadirian, 2004 [28]           | CC           | Included in Ginsburg, 2009 [29]                                  |
| Gram, 2016 [30]                | CO           | Included in Gaudet, 2017 [31]                                    |
| Heberg, 2019 [32]              | CO           | Included in Andersen, 2017 [33]                                  |
| Ishibe, 1998 [34]              | NCC          | Included in Xue, 2011 [22]                                       |
| Key, 2009 [35]                 | CO           | Included in Ordonez-Mena, 2016 [2] and Dossus, 2014 [36]         |
| Lemogne, 2013 [37]             | CO           | Included in Lemogne, 2013 [38]                                   |
| Li, 2004 [39]                  | CC           | Included in Mechanic, 2006 [13]                                  |
| Marcus, 2000 [40]              | CC           | Included in Mechanic, 2006 [13]                                  |
| McKenzie, 2015 [41]            | CO           | Included in Ordonez-Mena, 2016 [2] and Dossus, 2014 [36]         |
| Metsola, 2005 [42]             | CC           | Included in Sillanpaa, 2005 [43]                                 |
| Millikan, 1998 [44]            | CC           | Included in Ambrosone, 2008 [4]                                  |
| Millikan, 2004 [45]            | CC           | Included in Mechanic, 2006 [13]                                  |
| Mitrunen, 2001 [46]            | CC           | Included in Sillanpaa, 2005 [43]                                 |
| Mullooly, 2017 [47]            | CO           | Included in Ordonez-Mena, 2016 [2]                               |
| Pachkowski, 2006 [48]          | CC           | Included in Mechanic, 2006 [13]                                  |
| Park, 2016 [49]                | PCC          | Singles cohorts already included with more information available |
| Schechter, 1985 [50]           | CC           | Included in Catsburg, 2015 [17]                                  |
| Schechter, 1989 [51]           | CC           | Included in Catsburg, 2015 [17]                                  |
| Shankar, 2008 [52]             | CO           | Included in Gaudet, 2017 [31]                                    |
| Shen, 2005 [53]                | CC           | Included in Mordukhovich, 2010 [54]                              |
| Shen, 2005 [55]                | CC           | Included in Mordukhovich, 2010 [54]                              |

| <b>First Author, year</b> | <b>Study design</b> | <b>Reason of exclusion</b>          |
|---------------------------|---------------------|-------------------------------------|
| Shen, 2006 [56]           | CC                  | Included in Mordukhovich, 2010 [54] |
| Tamimi, 2004 [57]         | NCC                 | Included in Xue, 2011 [22]          |
| Terry, 2002 [58]          | CO                  | Included in Catsburg, 2015 [17]     |
| Van Ryswyk, 2016 [59]     | CC                  | Included in Johnson, 2000 [60]      |
| White, 2016 [61]          | CC                  | Included in Mordukhovich, 2010 [54] |
| Williams, 2019 [62]       | CC                  | Included in Mechanic, 2006 [13]     |

CC, case-control study; CO, cohort study; CI, confidence interval; NCC, nested case-control study; NOS, non-original study; PCC, pooled case-control study; RR, relative-risk.

**eTable 2.** Main characteristics of the 115 case-control studies on the association between cigarette smoking and breast cancer risk included in the review, and corresponding information contributing to the meta-analysis

| First author, year   | Country                  | Type of controls | Number of Cases | Number of Controls | Cigarette smoking |        |      |           |      |          |      | Genetic factor | Strata |        |
|----------------------|--------------------------|------------------|-----------------|--------------------|-------------------|--------|------|-----------|------|----------|------|----------------|--------|--------|
|                      |                          |                  |                 |                    | Status            |        |      | Intensity |      | Duration |      |                |        | TSQ    |
|                      |                          |                  |                 |                    | Current           | Former | Ever | Current   | Ever | Current  | Ever |                |        | Former |
| Adami, 1988 [63]     | Sweden, Norway           | P                | 422             | 527                |                   |        | X    |           | X    |          | X    |                |        |        |
| Ahern, 2009 [64]     | USA                      | P                | 557             | 432                |                   |        |      |           |      |          |      |                |        | Menop  |
| Alberg, 2004 [65]    | USA                      | P                | 110             | 113                | X                 | X      | O    |           |      |          |      |                | NAT2   |        |
| Alim, 2016 [66]      | Turkey                   | P                | 40              | 40                 |                   |        | X    |           |      |          |      |                |        |        |
| Alsolami, 2019 [67]  | Saudi Arabia             | P                | 214             | 218                |                   |        | X    |           |      |          |      |                |        |        |
| Ambrosone, 2008 [4]  | USA, Europe <sup>a</sup> | H/P              | 5,201           | 5,829              |                   |        | O    |           |      |          | O    |                | NAT2   |        |
| Andonova, 2010 [68]  | Germany                  | P                | 1,143           | 1,155              | X                 | X      | O    |           |      |          |      |                |        |        |
| Band, 2002 [69]      | Canada                   | P                | 1,018           | 1,025              |                   |        | O    |           | O    |          | O    |                |        | Menop  |
| Bano, 2016 [70]      | Pakistan                 | P                | 1,238           | 1,008              |                   |        | X    |           |      |          |      |                |        |        |
| Baron, 1986 [71]     | USA                      | H                | 1,741           | 2,128              |                   |        | O    |           |      |          |      |                |        |        |
| Baron, 1996 [72]     | USA                      | P                | 6,888           | 9,529              | X                 | X      | O    |           | X    |          | X    | O              |        | Menop  |
| Bennicke, 1995 [73]  | Denmark                  | H                | 230             | 3,010              |                   |        | O    |           |      |          | X    |                |        |        |
| Berrandou, 2019 [74] | France                   | P                | 1,125           | 1,172              | X                 | X      | O    |           | X    |          | X    | X              |        | Menop  |
| Bowlin, 1997 [75]    | USA                      | P                | 1,214           | 1,214              |                   |        | X    |           |      |          |      |                |        |        |
| Braga, 1996 [76]     | Italy                    | H                | 2,569           | 2,588              | X                 | X      | X    |           | X    |          | X    | O              |        | Menop  |
| Brinton, 1986 [77]   | USA                      | P                | 1,547           | 1,930              | X                 | X      | X    |           | X    |          | X    |                |        | Menop  |
| Brown, 2010 [78]     | USA                      | P                | 597             | 966                | X                 | X      | X    |           | X    |          | X    | O              |        |        |
| Brownson, 1988 [79]  | USA                      | P                | 456             | 1,693              | X                 | X      | O    |           | O    |          | O    |                |        |        |
| Brunet, 1998 [80]    | USA, Canada              | H                | 186             | 186                |                   |        | X    |           | X    |          |      |                | BRCA   |        |
| Catsburg, 2014 [81]  | Canada                   | P                | 1,096           | 3,314              | X                 | X      | X    |           | X    |          | X    |                |        | Menop  |

| First author, year         | Country            | Type of controls | Number of Cases | Number of Controls | Cigarette smoking |        |      |           |      |          |      |        | Genetic factor | Strata       |
|----------------------------|--------------------|------------------|-----------------|--------------------|-------------------|--------|------|-----------|------|----------|------|--------|----------------|--------------|
|                            |                    |                  |                 |                    | Status            |        |      | Intensity |      | Duration |      | TSQ    |                |              |
|                            |                    |                  |                 |                    | Current           | Former | Ever | Current   | Ever | Current  | Ever | Former |                |              |
| Cerne, 2011 [82]           | Slovenia           | H                | 784             | 709                |                   |        | O    |           | X    |          |      |        |                |              |
| Chu, 1990 [83]             | USA                | P                | 4,720           | 4,682              | X                 | X      | X    |           | X    |          | X    |        |                | Menop        |
| Colilla, 2006 [84]         | USA, Canada        | H                | 176             | 140                |                   |        | X    |           |      |          |      |        | BRCA1          |              |
| Conlon, 2010 [85]          | Canada             | P                | 347             | 775                | X                 | X      | X    |           | X    |          | X    | O      | NAT2           |              |
| Connor, 2016 [86]          | USA, Mexico        | P                | 3,780           | 4,137              | X                 | X      | O    |           | X    |          | X    |        |                | Menop        |
| Cooper, 1989 [87]          | Australia          | P                | 451             | 451                |                   |        |      |           |      |          |      |        |                | ER           |
| Cotterchio, 2003 [88]      | Canada             | P                | 3,746           | 3,691              |                   |        | O    |           |      |          |      |        |                | ER,<br>Menop |
| Croghan, 2009 [89]         | USA                | H                | 1,225           | 6,872              |                   |        | X    |           |      |          |      |        |                |              |
| Delfino, 2000 [90]         | USA                | H                | 113             | 278                | X                 | X      | O    |           | X    |          | X    |        | NAT2           |              |
| Dianatinasab, 2019 [19]    | Iran               | H                | 1,009           | 1,009              |                   |        | X    |           |      |          |      |        |                |              |
| Ellingjord-Dale, 2017 [91] | Norway             | P                | 4,402           | 24,760             |                   |        |      | X         |      |          |      |        |                | ER           |
| Ellingjord-Dale, 2018 [92] | Norway             | P                | 4,402           | 24,760             | X                 | X      | O    |           |      |          |      |        |                | ER           |
| Ewertz, 1990 [25]          | Denmark            | P                | 1,694           | 1,705              | X                 | X      | O    |           | X    |          | X    |        |                | Menop        |
| Field, 1992 [93]           | USA                | P                | 1,617           | 1,617              |                   |        | X    |           |      |          | X    |        |                |              |
| Furberg, 2002 [94]         | USA                | P                | 683             | 790                |                   |        |      |           |      |          |      |        | p53            |              |
| Gammon, 1998 [11]          | USA                | P                | 2,199           | 2,009              | X                 | X      | X    | X         |      | X        |      | O      |                | ER           |
| Gammon, 1999 [95]          | USA                | P                | 509             | 462                |                   |        |      |           |      |          |      |        | p53            |              |
| Gammon, 2004 [96]          | USA                | P                | 1,356           | 1,383              |                   |        |      |           |      |          |      |        |                | ER,<br>Menop |
| Gao, 2013 [97]             | China              | P                | 669             | 682                |                   |        | X    |           |      |          |      |        |                |              |
| Gaudet, 2005 [98]          | USA                | P                | 1,034           | 1,084              |                   |        |      | O         |      | O        |      |        |                |              |
| Gibson, 2010 [99]          | Philippines        | P                | 123             | 978                |                   |        | X    |           |      |          |      |        |                |              |
| Ginsburg, 2009 [29]        | Multiple countries | H                | 2,538           | 2,538              | O                 | O      | X    |           |      |          |      |        | BRCA           |              |

| First author, year        | Country                         | Type of controls | Number of Cases | Number of Controls | Cigarette smoking |        |      |           |      |          |      |        | Genetic factor | Strata    |
|---------------------------|---------------------------------|------------------|-----------------|--------------------|-------------------|--------|------|-----------|------|----------|------|--------|----------------|-----------|
|                           |                                 |                  |                 |                    | Status            |        |      | Intensity |      | Duration |      | TSQ    |                |           |
|                           |                                 |                  |                 |                    | Current           | Former | Ever | Current   | Ever | Current  | Ever | Former |                |           |
| Godinho-Mota, 2019 [100]  | Brazil                          | P                | 197             | 344                | X                 | X      | O    |           |      |          |      |        |                |           |
| Gronwald, 2006 [101]      | Poland                          | H                | 348             | 348                |                   |        | X    |           |      |          |      |        | BRCA1          |           |
| Hamajima, 2002 [102]      | Multiple countries              | H/P              | 58,515          | 95,067             | X                 | X      | X    |           |      |          |      |        |                |           |
| Hara, 2017 [103]          | Japan                           | H                | 511             | 527                | X                 | X      | X    |           |      |          | X    |        | NAT2           | Menop     |
| Hiatt, 1988 [104]         | USA                             | P                | 303             | 5,800              | O                 | X      | O    | X         |      |          |      |        |                |           |
| Hsieh, 2014 [105]         | Taiwan                          | H/P              | 737             | 719                |                   |        | X    |           |      |          |      |        |                |           |
| Huang, 1999 [106]         | Taiwan                          | P                | 150             | 150                |                   |        | X    |           |      |          |      |        |                |           |
| Huang, 2000 [107]         | USA                             | P                | 862             | 790                |                   |        |      |           |      |          |      |        |                | ER, Menop |
| Hunter, 1997 [108]        | USA                             | P                | 466             | 466                |                   |        |      |           |      |          |      |        | NAT2           |           |
| Ilic, 2014 [109]          | Serbia                          | H                | 191             | 191                | X                 | X      | X    |           | X    |          | X    | O      |                |           |
| Johnson, 2000 [60]        | Canada                          | P                | 2,317           | 2,438              | O                 | O      | O    |           |      |          |      |        |                | Menop     |
| Kato, 1992 [110]          | Japan                           | H                | 908             | 908                |                   |        | X    |           |      |          |      |        |                |           |
| Krajinovic, 2001 [111]    | Canada                          | P                | 149             | 70                 |                   |        | O    |           |      |          |      |        | NAT2           |           |
| Kropp, 2002 [112]         | Germany                         | P                | 468             | 1,093              | X                 | X      |      |           |      |          |      | O      |                |           |
| Kruk, 2007 [113]          | Poland                          | H                | 858             | 1,085              |                   |        | O    |           | O    |          |      |        |                | Menop     |
| Lash, 1999 [114]          | USA                             | P                | 265             | 765                |                   |        | X    |           | X    |          | X    |        |                |           |
| Lash, 2002 [115]          | USA                             | P                | 666             | 615                |                   |        | X    |           | X    |          | X    |        |                |           |
| Li, 2005 [116]            | USA                             | P                | 975             | 1,005              | X                 | X      | X    |           | X    |          | X    | O      |                | ER        |
| Li, 2020 <sup>b</sup> [8] | Multiple countries <sup>a</sup> | P                |                 |                    |                   |        | X    |           | X    |          |      |        | BRCA           |           |
| Lilla, 2005 [117]         | Germany                         | P                | 419             | 884                |                   |        |      |           | O    |          |      |        | NAT2           |           |
| Lissowska, 2006 [118]     | Poland                          | P                | 2,386           | 2,502              | X                 | X      |      |           | X    |          |      |        | NAT2           | ER        |
| Magnusson, 2007 [119]     | Sweden                          | P                | 3,345           | 3,454              | X                 | X      | O    | X         |      | X        |      |        |                |           |
| Manjer, 2004 [120]        | Sweden                          | P                | 260             | 514                | X                 | X      | X    | X         |      |          | X    | O      |                |           |

| First author, year         | Country     | Type of controls | Number of Cases | Number of Controls | Cigarette smoking |        |      |           |      |          |      |        |       | Genetic factor | Strata    |
|----------------------------|-------------|------------------|-----------------|--------------------|-------------------|--------|------|-----------|------|----------|------|--------|-------|----------------|-----------|
|                            |             |                  |                 |                    | Status            |        |      | Intensity |      | Duration |      | TSQ    |       |                |           |
|                            |             |                  |                 |                    | Current           | Former | Ever | Current   | Ever | Current  | Ever | Former |       |                |           |
| Martin-Moreno, 1993 [121]  | Spain       | P                | 762             | 988                |                   |        | X    |           |      |          |      |        |       |                |           |
| McCredie, 1998 [122]       | Australia   | P                | 467             | 408                |                   |        | X    |           |      |          |      |        |       |                |           |
| McTiernan, 1986 [123]      | USA         | P                | 329             | 332                |                   |        |      |           |      |          |      |        |       |                | ER        |
| Meara, 1989 [124]          | UK          | H/P              | 1,116           | 1,116              | O                 | X      | O    | X         |      |          |      |        |       |                |           |
| Mechanic, 2006 [13]        | USA         | P                | 2,311           | 2,022              | O                 | O      | O    |           | O    |          | O    | O      |       |                |           |
| Millikan, 2000 [125]       | USA         | P                | 688             | 663                |                   |        |      |           |      |          |      |        | GSTM1 |                |           |
| Morabia, 1996 [126]        | Switzerland | P                | 244             | 1,032              | O                 | O      |      | X         | X    |          |      |        |       |                |           |
| Morabia, 1998 [127]        | Switzerland | P                | 242             | 1,059              |                   |        |      |           |      |          |      |        |       |                | ER, Menop |
| Morabia, 2000 [128]        | Switzerland | P                | 177             | 170                |                   |        |      |           |      |          |      |        | NAT2  |                |           |
| Mordukhovich, 2010 [54]    | USA         | P                | 1,508           | 1,556              | O                 | O      | O    |           |      |          |      |        | p53   |                |           |
| Nishino, 2014 [129]        | Japan       | H                | 1,263           | 3,160              | O                 | O      | O    |           | O    |          | O    |        |       |                | ER, Menop |
| O'Connell, 1987 [130]      | USA         | P                | 276             | 1,519              | O                 | X      | O    | X         |      |          |      |        |       |                |           |
| Ozmen, 2009 [131]          | Turkey      | H                | 1,492           | 2,167              |                   |        | X    |           |      |          |      |        |       |                |           |
| Palmer, 1991 [132]         | Canada, USA | H/P              | 2,562           | 2,019              | X                 | X      | X    |           | X    |          |      |        |       |                |           |
| Pawlega, 1992 [133]        | Poland      | P                | 127             | 250                |                   |        | O    |           |      |          | O    |        |       |                |           |
| Pieta, 2012 [134]          | Poland      | H                | 138             | 1,144              |                   |        | O    |           |      |          |      |        |       |                |           |
| Pimhanam, 2014 [135]       | Thailand    | P                | 444             | 444                |                   |        | O    |           |      |          |      |        |       |                |           |
| Plagens-Rotman, 2017 [136] | Poland      | H                | 79              | 683                |                   |        | X    |           | X    |          |      |        |       |                |           |
| Pongsavee, 2018 [137]      | Thailand    | P                | 155             | 122                |                   |        | X    |           |      |          |      |        |       |                |           |
| Prescott, 2007 [138]       | USA         | P                | 1,728           | 441                | X                 | X      | X    |           | X    |          | X    |        |       |                |           |
| Rabstein, 2010 [139]       | Germany     | P                | 1,020           | 1,047              |                   |        |      |           |      |          |      |        | NAT2  |                | ER        |
| Rajaei, 2015 [140]         | Iran        | P                | 607             | 438                |                   |        | X    |           |      |          |      |        |       |                |           |

| First author, year      | Country    | Type of controls | Number of Cases | Number of Controls | Cigarette smoking |        |      |           |      |          |      |        |                | Genetic factor | Strata |
|-------------------------|------------|------------------|-----------------|--------------------|-------------------|--------|------|-----------|------|----------|------|--------|----------------|----------------|--------|
|                         |            |                  |                 |                    | Status            |        |      | Intensity |      | Duration |      | TSQ    |                |                |        |
|                         |            |                  |                 |                    | Current           | Former | Ever | Current   | Ever | Current  | Ever | Former |                |                |        |
| Ranstam, 1995 [141]     | Sweden     | P                | 393             | 449                |                   |        | O    |           | O    |          |      |        |                |                | Menop  |
| Rautalahti, 1993 [142]  | Finland    | P                | 67              | 157                |                   |        | X    |           | X    |          | X    |        |                |                | Menop  |
| Richardson, 1989 [143]  | France     | H                | 349             | 459                |                   |        | X    |           |      |          |      |        |                |                |        |
| Roddam, 2007 [144]      | UK         | P                | 639             | 640                | X                 | X      | O    |           |      |          |      |        |                |                |        |
| Rohan, 1989 [145]       | Australia  | P                | 451             | 451                | X                 | X      | O    | X         |      |          |      |        |                |                | Menop  |
| Rollison, 2008 [146]    | USA        | P                | 287             | 311                |                   |        | X    |           | X    |          | X    |        |                |                |        |
| Ruszczuk, 2016 [147]    | USA        | P                | 831             | 1,620              |                   |        | O    |           |      |          |      |        |                |                |        |
| Shore, 2008 [148]       | USA        | P                | 612             | 612                |                   |        | O    |           |      |          |      |        |                |                |        |
| Sillanpaa, 2005 [43]    | Finland    | P                | 483             | 482                | X                 | X      |      |           |      |          |      |        | NAT2           |                |        |
| Slattery, 2008 [149]    | USA        | P                | 2,556           | 2,606              | O                 | O      | O    |           |      |          |      |        |                |                | Menop  |
| Smith, 1994 [150]       | UK         | P                | 755             | 755                |                   |        | X    |           | X    |          | X    |        |                |                |        |
| Stanford, 1987 [151]    | USA        | P                | 458             | 568                |                   |        |      |           |      |          |      |        |                |                | ER     |
| Trivers, 2009 [152]     | USA        | P                | 831             | 913                | O                 | O      | O    |           |      |          |      |        |                |                | ER     |
| Tung, 1999 [153]        | Japan      | H                | 376             | 430                | X                 | X      | O    |           |      |          |      |        |                |                | Menop  |
| Ueji, 1998 [154]        | Japan      | P                | 148             | 303                |                   |        | X    |           |      |          |      |        |                |                | Menop  |
| van der Hel, 2003 [155] | Netherland | P                | 229             | 264                |                   |        |      |           | X    |          |      |        | NAT2,<br>GSTM1 |                | Menop  |
| van der Hel, 2005 [156] | Netherland | P                | 676             | 669                | O                 | X      |      | X         |      |          |      |        | NAT2,<br>GSTM1 |                |        |
| Viladiu, 1996 [157]     | Spain      | P                | 330             | 346                |                   |        | X    |           |      |          |      |        |                |                |        |
| Wakai, 1994 [158]       | Japan      | H                | 300             | 900                | X                 | X      | O    |           |      |          |      |        |                |                | Menop  |
| Wang, 2011 [159]        | China      | P                | 400             | 400                |                   |        | X    |           |      |          |      |        |                |                | Menop  |
| White, 1994 [160]       | USA        | P                | 747             | 961                | X                 | X      | O    |           |      |          |      |        |                |                |        |



| First author, year | Country             | Type of controls | Number of Cases | Number of Controls | Cigarette smoking |        |      |           |      |          |      |        | Genetic factor | Strata |
|--------------------|---------------------|------------------|-----------------|--------------------|-------------------|--------|------|-----------|------|----------|------|--------|----------------|--------|
|                    |                     |                  |                 |                    | Status            |        |      | Intensity |      | Duration |      | TSQ    |                |        |
|                    |                     |                  |                 |                    | Current           | Former | Ever | Current   | Ever | Current  | Ever | Former |                |        |
| Yang, 1997 [161]   | Taiwan              | H                | 224             | 450                |                   |        | X    |           |      |          |      |        |                | Menop  |
| Yoo, 1997 [162]    | Japan               | H                | 1,154           | 21,714             |                   |        | X    |           |      |          |      |        |                | ER     |
| Young, 2009 [163]  | Canada <sup>a</sup> | P                | 6,235           | 6,533              |                   |        | X    |           |      |          |      |        |                |        |
| Yuan, 1988 [164]   | China               | P                | 534             | 534                |                   |        | X    |           |      |          |      |        |                |        |
| Zheng, 1999 [165]  | USA                 | P                | 273             | 657                |                   |        |      |           |      |          |      |        | NAT1           |        |
| Zheng, 2002 [166]  | USA                 | H                | 338             | 345                | X                 | X      | X    |           | X    |          | X    |        | GSTM1          | Menop  |
| Zheng, 2011 [167]  | China               | P                | 1,541           | 1,598              |                   |        | X    |           |      |          |      |        |                |        |
| Total (1986–2020)  |                     |                  | 181,415         | 313,384            | 46                | 46     | 92   | 11        | 36   | 3        | 31   | 11     | 25             | 40     |

H, hospital; Menop, Menopausal status; O symbol indicates that estimates were derived from the information provided in the original study publication; P, population; TSQ, time-since-quitting; X symbol indicates that estimates were provided in the original study publication.

<sup>a</sup>Pooled-analysis

<sup>b</sup>This article includes both a case-control study and a cohort study

**eTable 3.** Main characteristics of the 54 cohort studies on the association between cigarette smoking and breast cancer risk included in the review, and corresponding information contributing to the meta-analysis

| First author, year     | Country (study acronym)             | Endpoint | Number of Cases | Cigarette smoking |        |      |           |      |          |      |        |   | Genetic factors | Strata    |
|------------------------|-------------------------------------|----------|-----------------|-------------------|--------|------|-----------|------|----------|------|--------|---|-----------------|-----------|
|                        |                                     |          |                 | Status            |        |      | Intensity |      | Duration |      | TSQ    |   |                 |           |
|                        |                                     |          |                 | Current           | Former | Ever | Current   | Ever | Current  | Ever | Former |   |                 |           |
| Akiba, 1990 [168]      | Japan (6 prefectures) <sup>a</sup>  | m        | 204             | X                 |        |      | X         |      |          |      |        |   |                 |           |
| Al-Delaimy, 2004 [169] | USA (NHSII)                         | i        | 1,009           | X                 | X      | O    | X         |      |          |      | X      |   |                 | ER        |
| Andersen, 2017 [33]    | Denmark (DNC)                       | i        | 1,162           | X                 | X      | X    |           | X    |          |      | X      |   |                 | ER, Menop |
| Arthur, 2018 [170]     | USA (WHI)                           | i        | 8,168           | O                 | O      | O    | X         |      |          |      |        |   |                 |           |
| Arthur, 2020 [171]     | UK (UK Biobank)                     | i        | 3,422           | O                 | O      | O    |           |      |          |      |        |   |                 | Menop     |
| Bjerkaas, 2013 [6]     | Norway (NNHSS)                      | i        | 7,490           | X                 | X      | X    |           | X    |          |      | X      |   |                 |           |
| Blakely, 2013 [172]    | New Zealand (NZCR)                  | i        | 12,384          | X                 | X      | O    |           |      |          |      |        |   |                 |           |
| Calle, 1994 [173]      | USA, Puerto Rico (CPS-II)           | m        | 880             | X                 | X      | X    | X         |      |          | X    |        |   |                 |           |
| Carter, 2015 [174]     | USA (multiple cohorts) <sup>b</sup> | m        | 2,022           | X                 |        |      |           |      |          |      |        |   |                 |           |
| Catsburg, 2015 [17]    | Canada (NBSS)                       | i        | 6,549           | X                 | X      | X    |           | X    |          |      | X      | X |                 |           |
| Coleman, 2020 [175]    | USA (NHIS)                          | m        | 2,099           | X                 | X      | O    |           |      |          |      |        |   |                 |           |
| Dossus, 2014 [36]      | Europe (EPIC)                       | i        | 9,822           | X                 | X      | X    | X         |      |          | X    |        | X |                 | ER, Menop |
| Engeland, 1996 [176]   | Norway (MS)                         | i        | 603             | X                 | X      | O    |           |      |          |      |        |   |                 |           |
| Gaudet, 2013 [177]     | USA (CPS-II)                        | i        | 3,721           | X                 | X      | O    | X         |      |          | X    |        |   |                 | ER        |
| Gaudet, 2017 [31]      | Multiple countries <sup>b</sup>     | i        | 36,060          | X                 | X      | O    | X         |      |          | X    |        |   |                 | ER, Menop |
| Goodman, 1997 [178]    | Japan (RERF-LSS)                    | i        | 161             | X                 | X      | X    |           |      |          |      |        |   |                 |           |
| Gram, 2005 [179]       | Norway, Sweden (NSCS)               | i        | 1,240           | X                 | X      | X    | X         |      |          | X    |        |   |                 |           |
| Gram, 2015 [180]       | USA (MEC)                           | i        | 4,484           | X                 | X      | X    |           | X    |          |      | X      |   |                 |           |
| Gram, 2019 [181]       | USA (MEC)                           | i        | 4,230           |                   |        |      |           |      |          |      |        |   |                 | ER        |
| Hanaoka, 2005 [182]    | Japan (JPHC)                        | i        | 180             | X                 | X      | O    |           |      |          |      |        |   |                 | Menop     |

| First author, year        | Country (study acronym)                     | Endpoint | Number of Cases  | Cigarette smoking |        |      |           |      |          |      |        |  | Genetic factors | Strata    |
|---------------------------|---------------------------------------------|----------|------------------|-------------------|--------|------|-----------|------|----------|------|--------|--|-----------------|-----------|
|                           |                                             |          |                  | Status            |        |      | Intensity |      | Duration |      | TSQ    |  |                 |           |
|                           |                                             |          |                  | Current           | Former | Ever | Current   | Ever | Current  | Ever | Former |  |                 |           |
| Hiatt, 1986 [183]         | USA (KPMCP)                                 | i        | 1,363            | O                 | X      | O    | X         |      |          |      |        |  |                 | Menop     |
| Jacob, 2018 [184]         | UK (UKGP)                                   | i        | 8,924            | X                 |        |      |           |      |          |      |        |  |                 |           |
| Jee, 2004 [185]           | Korea (KCPS)                                | m        | 205              | X                 | X      | O    |           |      |          |      |        |  |                 |           |
| Jones, 2017 [186]         | UK (GSC)                                    | i        | 1,815            | X                 | X      | X    |           | X    |          | X    |        |  |                 | ER        |
| Ko, 2018 [187]            | Multiple countries (MLC_BRCA)               | i        | 428              | X                 | X      | X    |           | X    |          | X    |        |  | BRCA            |           |
| Land, 2014 [188]          | USA (NSABP P-1)                             | i        | 395              | X                 | X      | O    | X         | X    | X        | X    |        |  |                 |           |
| Lemogne, 2013 [38]        | France (GAZEL)                              | i        | 138              | O                 | O      | O    |           |      |          |      |        |  |                 |           |
| Li, 2020 <sup>d</sup> [8] | Multiple countries <sup>b</sup>             | i        |                  |                   |        | X    |           | X    |          |      |        |  | BRCA            |           |
| Lin, 2008 [189]           | Japan (JACC)                                | i        | 208              | X                 | X      | O    | X         |      |          |      |        |  |                 |           |
| London, 1989 [190]        | USA (NHS)                                   | i        | 1,788            |                   |        |      |           |      |          |      |        |  |                 | ER, Menop |
| Luo, 2011 [191]           | USA (WHI)                                   | i        | 3,520            |                   |        |      |           |      |          | X    |        |  |                 | ER        |
| Manjer, 2000 [192]        | Sweden (DPM)                                | i        | 416              | X                 | X      | O    | X         |      |          |      |        |  |                 | Menop     |
| Manjer, 2001 [193]        | Sweden (DPM)                                | i        | 268              |                   |        |      |           |      |          |      |        |  |                 | ER        |
| Meyer, 2015 [194]         | Switzerland (multiple cohorts) <sup>b</sup> | m        | 204              | O                 | X      | O    | X         |      |          |      |        |  |                 |           |
| Nordlund, 1997 [195]      | Sweden (SCR)                                | i        | 996              | X                 | X      | O    | X         |      |          |      |        |  |                 |           |
| Nyante, 2014 [196]        | USA (NIH-AARP)                              | i        | 7,481            |                   |        |      |           |      |          |      |        |  |                 | ER        |
| Olson, 2005 [197]         | USA (IWHS)                                  | i        | 2,017            | X                 | X      | O    |           |      |          | X    |        |  |                 |           |
| Ordonez-Mena, 2016 [2]    | Multiple countries (CHANCES) <sup>b</sup>   | i/m      | 15,085/<br>2,568 | X                 | X      | O    |           | X    |          | X    | X      |  |                 |           |
| Ozasa, 2007 [198]         | Japan (JACC)                                | m        | 93               | X                 | X      |      | X         |      | X        |      |        |  |                 |           |
| Park, 2020 [199]          | Korea (NBCSP)                               | i        | 55,538           |                   |        | X    |           |      |          |      |        |  |                 | Menop     |
| Pirie, 2013 [200]         | UK (MWS)                                    | m        | 3,207            | X                 |        |      | X         |      |          |      |        |  |                 |           |
| Reynolds, 2004 [201]      | USA (CTS)                                   | i        | 2,005            | X                 | X      | O    |           | X    |          | X    |        |  |                 | Menop     |
| Rosenberg, 2013 [202]     | USA (BWHS)                                  | i        | 1,377            | X                 | X      | X    |           |      |          |      |        |  |                 | Menop     |

| First author, year         | Country (study acronym)                   | Endpoint | Number of Cases | Cigarette smoking |        |      |           |      |          |      |        |   | Genetic factors | Strata |
|----------------------------|-------------------------------------------|----------|-----------------|-------------------|--------|------|-----------|------|----------|------|--------|---|-----------------|--------|
|                            |                                           |          |                 | Status            |        |      | Intensity |      | Duration |      | TSQ    |   |                 |        |
|                            |                                           |          |                 | Current           | Former | Ever | Current   | Ever | Current  | Ever | Former |   |                 |        |
| Schatzkin, 1989 [203]      | USA (FHS)                                 | i        | 143             |                   |        | O    |           | X    |          |      |        |   |                 |        |
| Swift, 2008 [204]          | USA, Canada (ATPF)                        | i        | 77              |                   |        | O    |           |      |          |      |        |   |                 |        |
| Taghizadeh, 2016 [205]     | Netherland (VVS)                          | m        | 117             | O                 | X      | O    | X         |      |          |      |        |   |                 |        |
| Tverdal, 1993 [206]        | Norway (5 areas) <sup>c</sup>             | m        | 70              | X                 | X      | O    | X         |      |          |      |        |   |                 |        |
| van den Brandt, 2017 [207] | Netherland (NLCS)                         | i        | 2,526           | X                 | X      | X    |           | X    |          | X    | X      |   |                 |        |
| Viner, 2019 [208]          | USA (ATP)                                 | i        | 483             | O                 | O      | O    |           |      |          |      |        |   |                 | Menop  |
| Wada, 2015 [209]           | Japan (TS)                                | i        | 166             | X                 | X      | O    |           |      |          |      |        |   |                 |        |
| White, 2017 [210]          | USA, Puerto Rico (NIEHS)                  | i        | 1,843           | X                 | X      | X    | X         |      | X        | X    | O      |   |                 |        |
| Xue, 2011 [22]             | USA (NHS)                                 | i        | 8,772           | X                 | X      | X    | X         |      |          | X    | O      |   |                 |        |
| Zeinomar, 2019 [9]         | Multiple countries (ProF-SC) <sup>b</sup> | i        | 1,009           | X                 | X      | O    |           |      |          |      |        |   |                 | ER     |
| Zheng, 2014 [211]          | Asia (ACC) <sup>b</sup>                   | m        | 1,108           |                   |        | O    |           |      |          |      |        |   |                 |        |
| Total (1986–2020)          |                                           |          | 229,675         | 44                | 40     | 44   | 20        | 12   | 8        | 15   | 6      | 2 |                 | 20     |

ACC, Asia Cohort Consortium; ATP, Alberta's Tomorrow Project; ATPF, A-T patients and their families; BWHS, Black Women Health Study; CHANCES, Consortium on Health and Aging: Network of Cohorts in Europe and the United States; CPS-II, Cancer Prevention Study II; CTS, California teacher Study; DNC, Danish Nurse Cohort; DPM, Department of Preventive Medicine in Malmö; EPIC, European Prospective Investigation into Cancer and Nutrition cohort study; FHS, Framingham Heart Study; GAZEL, Gaz et Electricité cohort; GSC, Generations Study cohort; i, incidence; IWHS, Iowa Women's Health Study; JACC, Japan Collaborative Cohort Study for Evaluation of Cancer; JPHC, Japan Public Health Center; KCPS, Korean Cancer Prevention Study; KPMCP, Kaiser Permanente Medical Care Program; MEC, Multiethnic Cohort Study; m, mortality; MLC\_BRCA, Multicenter longitudinal cohort of BRCA mutation carriers; MS, Multiple sites in the USA and Canada; MWS, Million Women Study; NBCSP, National breast cancer screening program; NBSS, National Breast Screening Study; NHIS, National Health Interview Survey; NHS, Nurses' Health Study; NHSII, Nurses' Health Study II; NIEHS, National Institute of Environmental Health Sciences; NIH-AARP, National Institutes of Health-AARP Diet and Health Study; NLCS, Netherlands Cohort Study; NNHSS, Norwegian National Health Screening Service; NSABP P-1, National Surgical Adjuvant Breast and Bowel Project Breast Cancer Prevention Trial; NSCS, Norwegian Swedish Cohort Study; NZCR, New Zealand Cancer Registry; O symbol indicates that estimates were derived from the information provided in the original study publication; ProF-SC, Prospective Family Study Cohort; RERF-LSS, Radiation Effects Research Foundation's extended Life Span Study; SCR, Swedish Cancer Registry; TS, Takayama Study; UKGP, UK general practitioners; VVS, Vlagtwedde-Vlaardingen study; WHI, Women's Health Initiative; X symbol indicates that estimates were provided in the original study publication.

<sup>a</sup>Six-prefecture Cohort Study

<sup>b</sup>Pooled-analysis

<sup>c</sup>Five areas in Norway

<sup>d</sup>This article includes both a case-control study and a cohort study

**eTable 4.** List of publications for which data have been partially excluded from the meta-analysis and reason for exclusion

| <b>First author, year</b>  | <b>Excluded estimate</b>                                          | <b>Reason of exclusion</b>                              |
|----------------------------|-------------------------------------------------------------------|---------------------------------------------------------|
| Ellingjord-Dale, 2017 [91] | Status (current, former)                                          | Included in Ellingjord-Dale, 2018 [92]                  |
| Gammon, 2004 [96]          | Status (ever)                                                     | Included in Mordukhovich, 2010 [54]                     |
| Gram, 2019 [181]           | Status (current, former, ever), intensity (ever), duration (ever) | Included in Gram, 2015 [180]                            |
| Hunter, 1997 [108]         | Status (former), intensity (current)                              | Included in Xue, 2011 [22]                              |
| Kropp, 2002 [112]          | Duration (ever)                                                   | Included in Ambrosone, 2008 [4]                         |
| Lissowska, 2006 [118]      | Status (ever), duration (ever)                                    | Included in Ambrosone, 2008 [4]                         |
| London, 1989 [190]         | Status (current), intensity (current)                             | Included in Xue, 2011 [22]                              |
| Luo, 2011 [191]            | Status (current, former), intensity (ever)                        | Included in Arthur, 2018 [170]                          |
| Manjer, 2001 [193]         | Status (current, former), intensity (current)                     | Included in Manjer, 2000 [192]                          |
| Morabia, 1998 [127]        | Intensity (ever)                                                  | Included in Morabia, 1996 [126]                         |
| Morabia, 2000 [128]        | Status (former, ever), intensity (current)                        | Included in Morabia, 1996 [126] and Ambrosone, 2008 [4] |
| Nyante, 2014 [196]         | Status (current, former), intensity (current, former)             | Included in Ordonez-Mena, 2016 [2]                      |
| Rabstein, 2010 [139]       | Status (current, former)                                          | Included in Andonova, 2010 [68]                         |
| van der Hel, 2003 [155]    | Duration (ever)                                                   | Included in Ambrosone, 2008 [4]                         |
| Zheng, 1999 [165]          | Status (ever)                                                     | Included in Olson, 2005 [197]                           |

**eFigure 1.** Flowchart for the selection of the original studies on the association between cigarette smoking and breast cancer risk included in the review and meta-analysis

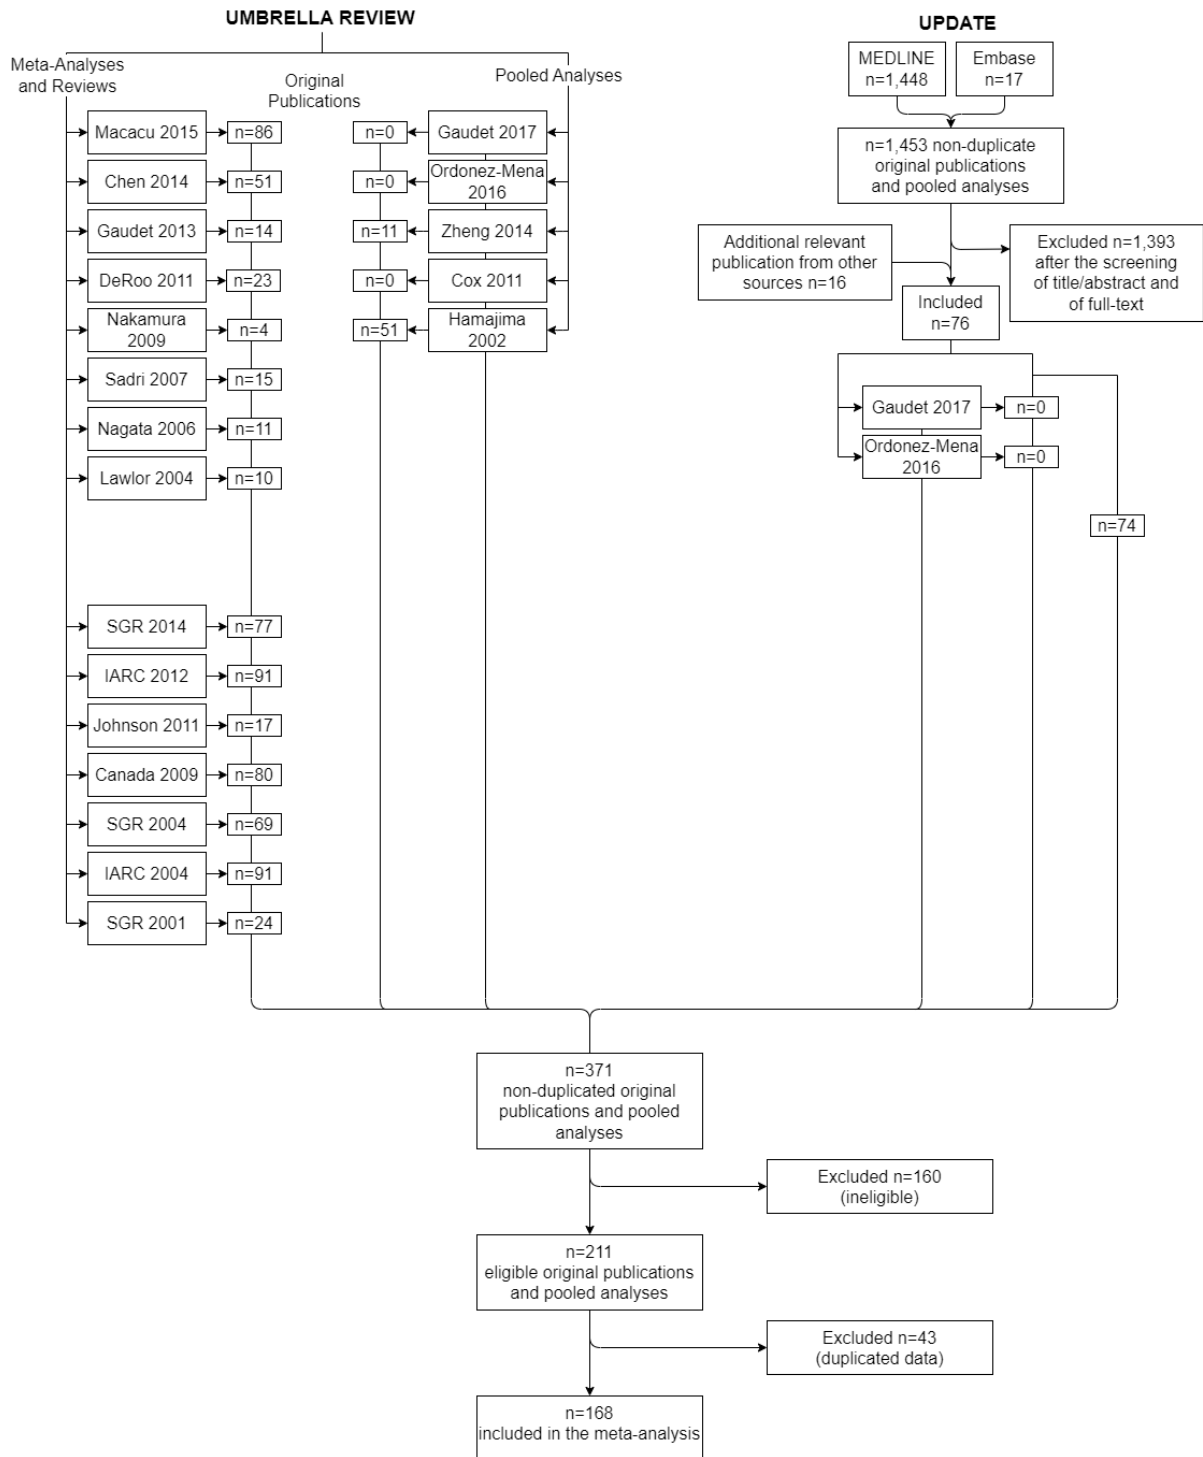

**eFigure 2.** Forest plot of study-specific and pooled relative risk (RR) of breast cancer for ever cigarette smokers (ES) versus never smokers (NS)

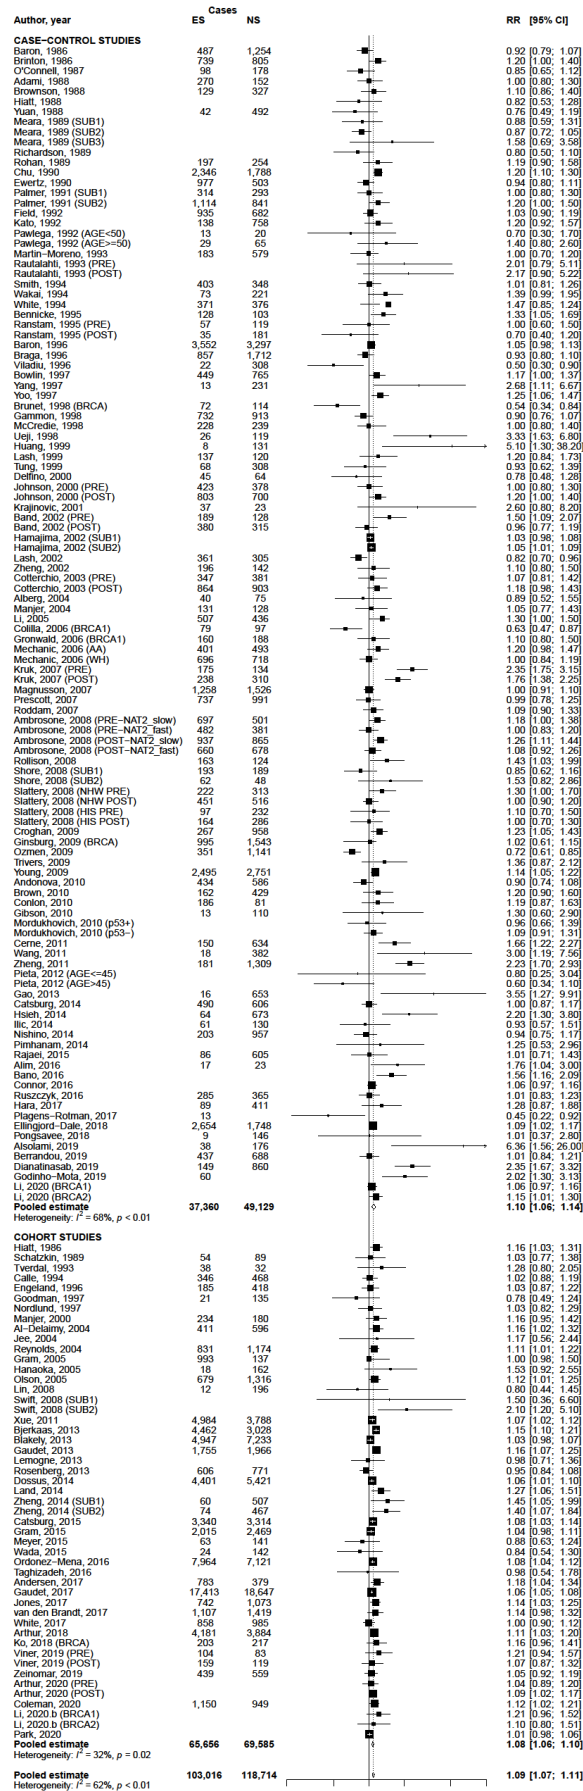



AA, African-American ethnicity; BRCA, BRCA mutation; BRCA1, BRCA1 mutation; BRCA2, BRCA2 mutation; CI, confidence interval; HIS, Hispanic ethnicity; NAT2\_fast, NAT2 fast polymorphism; NAT2\_slow, NAT2 slow polymorphism; NHW, non-Hispanic Caucasian ethnicity; p53-, p53 negative; p53+, p53 positive; POST, post-menopausal women; PRE, pre-menopausal women; SUB1, first subgroup; SUB2, second subgroup; SUB3, third subgroup; WH, white ethnicity.

**eFigure 3.** Forest plot of study-specific and pooled relative risk (RR) of breast cancer for ever cigarette smokers (ES) versus never smokers (NS) in women with selected genetic factors

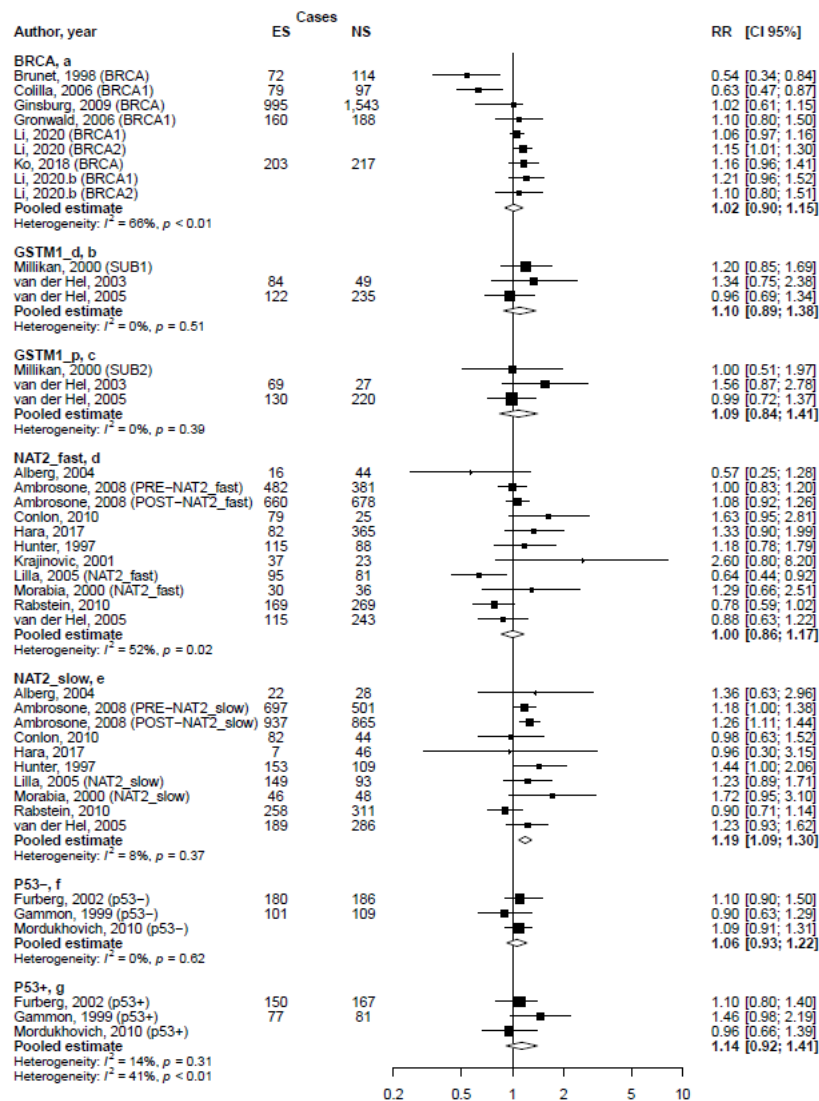

BRCA, BRCA mutation; BRCA1, BRCA1 mutation; BRCA2, BRCA2 mutation; CI, confidence interval; GSTM1\_d, GSTM1 null genotype; GSTM1\_p, GSTM1 present genotype; NAT2\_fast, NAT2 fast polymorphism; NAT2\_slow, NAT2 slow polymorphism; p53-, p53 negative; p53+, p53 positive; POST, post-menopausal women; PRE, pre-menopausal women; SUB1, first subgroup; SUB2, second subgroup.

**eFigure 4.** Funnel plot of studies on the association between current (panel A), former (panel B), and ever (panel C) cigarette smokers versus never smokers and breast cancer risk

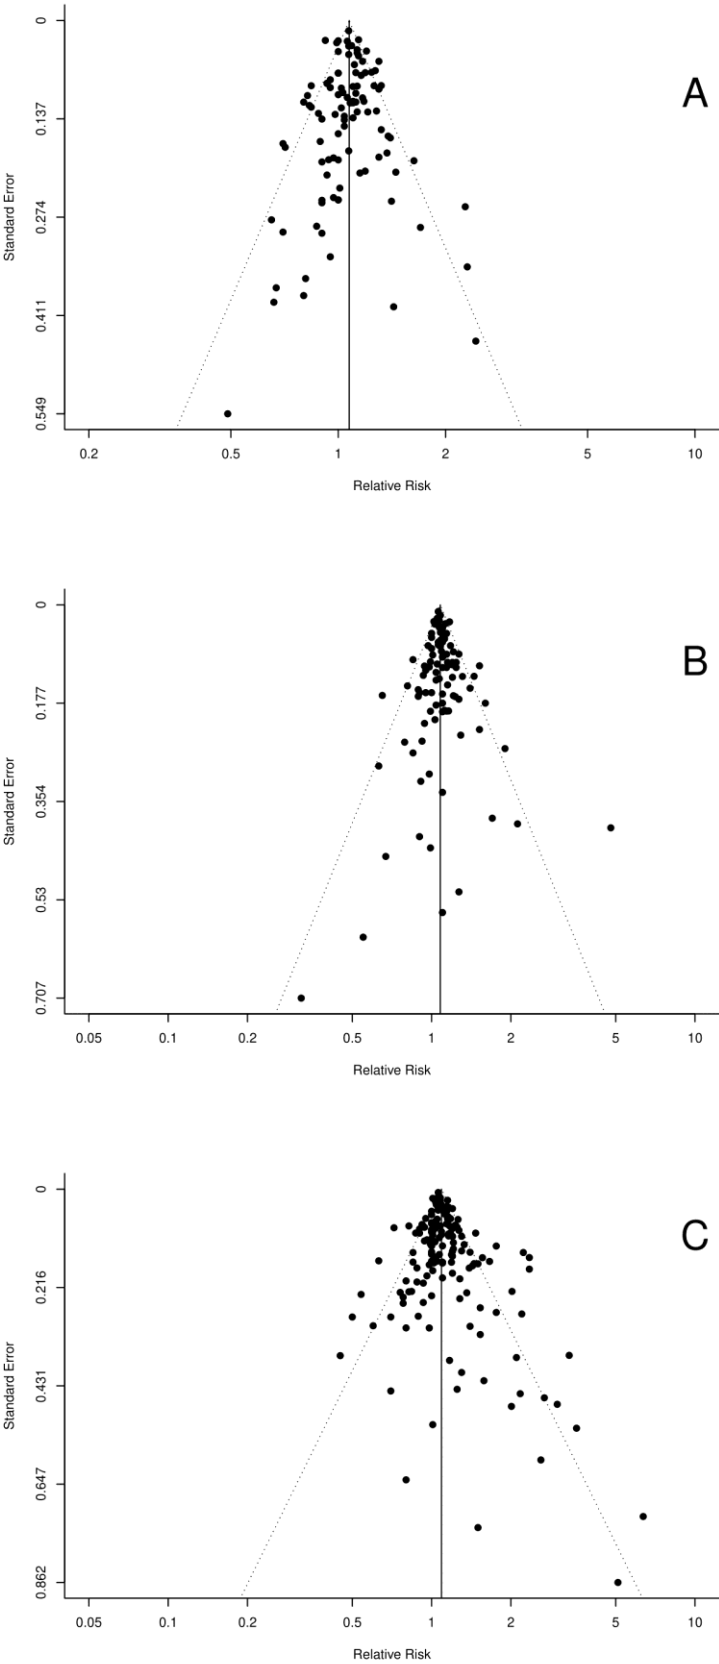

**eMaterial 1.** Literature search strings for the update of the last available comprehensive review used in PubMed/MEDLINE and Embase

| <b>Source</b> | <b>Date</b> | <b>Search string</b>                                                                                                                                                                                                                                                               | <b>N</b>               |
|---------------|-------------|------------------------------------------------------------------------------------------------------------------------------------------------------------------------------------------------------------------------------------------------------------------------------------|------------------------|
| PubMed        | 9/6/2020    | (breast) AND<br>(cancer OR neoplasm OR carcinoma OR adenocarcinoma OR Neoplasms [MeSH Terms]) AND<br>(cigarette OR cigarettes OR tobacco OR smoking OR smokers OR smoking [MeSH Terms]) AND<br>(English[Language]) AND<br>("2015"[Date - Publication]: "2020"[Date - Publication]) | 1448                   |
| Embase        | 9/6/2020    | cigarette:ti OR cigarettes:ti OR tobacco:ti OR smoking:ti OR smokers:ti AND (breast:ab,ti) AND<br>(cancer:ab,ti OR neoplasm:ab,ti OR carcinoma:ab,ti OR adenocarcinoma:ab,ti) AND<br>(article:it OR review:it) AND [english]/lim AND [2015-2020]/py NOT [medline]/lim              | 17                     |
|               |             | Duplicates                                                                                                                                                                                                                                                                         | 12                     |
| TOT           | 9/6/2020    | -                                                                                                                                                                                                                                                                                  | 1453<br>non duplicates |

**eMaterial 2.** Functions of the linear models used to estimate the associations between smoking intensity (current vs. never smokers), duration (current vs. never smokers) and time since quitting (former vs. current smokers) and the risk of breast cancer

---

**Smoking intensity (cigarettes/day)**

$$f(x) = 0.0057740x$$

**Smoking duration (years)**

$$f(x) = 0.0026293x$$

**Time since quitting (years)**

$$f(x) = -0.0013354x$$

---

## REFERENCES

1. Akinyemiju T, Wiener H, Pisu M. Cancer-related risk factors and incidence of major cancers by race, gender and region; analysis of the NIH-AARP diet and health study. *BMC Cancer* 2017; 17: 597.
2. Ordóñez-Mena JM, Schöttker B, Mons U et al.; Consortium on Health and Ageing: Network of Cohorts in Europe and the United States (CHANCES). Quantification of the smoking-associated cancer risk with rate advancement periods: meta-analysis of individual participant data from cohorts of the CHANCES consortium. *BMC Med* 2016; 14: 62.
3. Ambrosone CB, Freudenheim JL, Graham S et al. Cigarette smoking, N-acetyltransferase 2 genetic polymorphisms, and breast cancer risk. *JAMA* 1996; 276: 1494-1501.
4. Ambrosone CB, Kropp S, Yang J et al. Cigarette smoking, N-acetyltransferase 2 genotypes, and breast cancer risk: pooled analysis and meta-analysis. *Cancer Epidemiol Biomarkers Prev* 2008; 17: 15-26.
5. Bjerkaas E, Parajuli R, Engeland A et al. Social inequalities and smoking-associated breast cancer - Results from a prospective cohort study. *Prev Med* 2015; 73: 125-129.
6. Bjerkaas E, Parajuli R, Weiderpass E et al. Smoking duration before first childbirth: an emerging risk factor for breast cancer? Results from 302,865 Norwegian women. *Cancer Causes Control* 2013; 24: 1347-1356.
7. Breast Cancer Family Registry; Kathleen Cuninghame Consortium for Research into Familial Breast Cancer (Australasia); Ontario Cancer Genetics Network (Canada). Smoking and risk of breast cancer in carriers of mutations in BRCA1 or BRCA2 aged less than 50 years. *Breast Cancer Res Treat* 2008; 109: 67-75.
8. Li H, Terry MB, Antoniou AC et al. Alcohol Consumption, Cigarette Smoking, and Risk of Breast Cancer for BRCA1 and BRCA2 Mutation Carriers: Results from The BRCA1 and BRCA2 Cohort Consortium. *Cancer Epidemiol Biomarkers Prev* 2020; 29: 368-378.
9. Zeinomar N, Knight JA, Genkinger JM et al. Alcohol consumption, cigarette smoking, and familial breast cancer risk: findings from the Prospective Family Study Cohort (ProF-SC). *Breast Cancer Res* 2019; 21: 128.
10. Britton JA, Gammon MD, Schoenberg JB et al. Risk of breast cancer classified by joint estrogen receptor and progesterone receptor status among women 20-44 years of age. *Am J Epidemiol* 2002; 156: 507-516.
11. Gammon MD, Schoenberg JB, Teitelbaum SL et al. Cigarette smoking and breast cancer risk among young women (United States). *Cancer Causes Control* 1998; 9: 583-590.
12. Butler EN, Tse CK, Bell ME et al. Active smoking and risk of Luminal and Basal-like breast cancer subtypes in the Carolina Breast Cancer Study. *Cancer Causes Control* 2016; 27: 775-786.
13. Mechanic LE, Millikan RC, Player J et al. Polymorphisms in nucleotide excision repair genes, smoking and breast cancer in African Americans and whites: a population-based case-control study. *Carcinogenesis* 2006; 27: 1377-1385.
14. Chang-Claude J, Kropp S, Jäger B et al. Differential effect of NAT2 on the association between active and passive smoke exposure and breast cancer risk. *Cancer Epidemiol Biomarkers Prev* 2002; 11: 698-704.
15. Cox DG, Dostal L, Hunter DJ et al.; Breast and Prostate Cancer Cohort Consortium. N-acetyltransferase 2 polymorphisms, tobacco smoking, and breast cancer risk in the breast and prostate cancer cohort consortium. *Am J Epidemiol* 2011; 174: 1316-1322.
16. Cui Y, Miller AB, Rohan TE. Cigarette smoking and breast cancer risk: update of a prospective cohort study. *Breast Cancer Res Treat* 2006; 100: 293-299.
17. Catsburg C, Miller AB, Rohan TE. Active cigarette smoking and risk of breast cancer. *Int J Cancer* 2015; 136: 2204-2209.
18. Dianatinasab M, Fararouei M, Mohammadianpanah M et al. Hair Coloring, Stress, and Smoking Increase the Risk of Breast Cancer: A Case-Control Study. *Clin Breast Cancer* 2017; 17: 650-659.
19. Dianatinasab M, Fararouei M, Daneshi N et al. Heterogeneity in risk factors for ductal and lobular breast carcinomas: A case-control study. *Int J Cancer* 2019; 145: 2917-2925.
20. Duell EJ, Millikan RC, Pittman GS et al. Polymorphisms in the DNA repair gene XRCC1 and breast cancer. *Cancer Epidemiol Biomarkers Prev* 2001; 10: 217-222.

21. Egan KM, Stampfer MJ, Hunter D et al.; Nurses' Health Study. Active and passive smoking in breast cancer: prospective results from the Nurses' Health Study. *Epidemiology* 2002; 13: 138-145.
22. Xue F, Willett WC, Rosner BA et al. Cigarette smoking and the incidence of breast cancer. *Arch Intern Med* 2011; 171: 125-133.
23. Egan KM, Newcomb PA, Titus-Ernstoff L et al. Association of NAT2 and smoking in relation to breast cancer incidence in a population-based case-control study (United States). *Cancer Causes Control* 2003; 14: 43-51.
24. Ewertz M. Breast cancer in Denmark. Incidence, risk factors, and characteristics of survival. *Acta Oncol* 1993; 32: 595-615.
25. Ewertz M. Smoking and breast cancer risk in Denmark. *Cancer Causes Control* 1990; 1: 31-37.
26. Fararouei M, Iqbal A, Rezaian S et al. Dietary Habits and Physical Activity are Associated With the Risk of Breast Cancer Among Young Iranian Women: A Case-control Study on 1010 Premenopausal Women. *Clin Breast Cancer* 2019; 19: e127-e134.
27. García-Closas M, Kelsey KT, Hankinson SE et al. Glutathione S-transferase mu and theta polymorphisms and breast cancer susceptibility. *J Natl Cancer Inst* 1999; 91: 1960-1964.
28. Ghadirian P, Lubinski J, Lynch H et al. Smoking and the risk of breast cancer among carriers of BRCA mutations. *Int J Cancer* 2004; 110: 413-416.
29. Ginsburg O, Ghadirian P, Lubinski J et al.; Hereditary Breast Cancer Clinical Study Group. Smoking and the risk of breast cancer in BRCA1 and BRCA2 carriers: an update. *Breast Cancer Res Treat* 2009; 114: 127-135.
30. Gram IT, Little MA, Lund E, Braaten T. The fraction of breast cancer attributable to smoking: The Norwegian women and cancer study 1991-2012. *Br J Cancer* 2016; 115: 616-623.
31. Gaudet MM, Carter BD, Brinton LA et al. Pooled analysis of active cigarette smoking and invasive breast cancer risk in 14 cohort studies. *Int J Epidemiol* 2017; 46: 881-893.
32. Heberg J, Simonsen MK, Danielsen AK et al. Joint tobacco smoking and alcohol intake exacerbates cancer risk in women- the Danish nurse cohort. *Eur J Oncol Nurs* 2019; 43: 101675.
33. Andersen ZJ, Jørgensen JT, Grøn R et al. Active smoking and risk of breast cancer in a Danish nurse cohort study. *BMC Cancer* 2017; 17: 556.
34. Ishibe N, Hankinson SE, Colditz GA et al. Cigarette smoking, cytochrome P450 1A1 polymorphisms, and breast cancer risk in the Nurses' Health Study. *Cancer Res* 1998; 58: 667-671.
35. Key TJ, Appleby PN, Spencer EA et al. Cancer incidence in vegetarians: results from the European Prospective Investigation into Cancer and Nutrition (EPIC-Oxford). *Am J Clin Nutr* 2009; 89: 1620S-1626S.
36. Dossus L, Boutron-Ruault MC, Kaaks R et al. Active and passive cigarette smoking and breast cancer risk: results from the EPIC cohort. *Int J Cancer* 2014; 134: 1871-1888.
37. Lemogne C, Consoli SM, Geoffroy-Perez B et al. Personality and the risk of cancer: a 16-year follow-up study of the GAZEL cohort. *Psychosom Med* 2013; 75: 262-271.
38. Lemogne C, Consoli SM, Melchior M et al. Depression and the risk of cancer: a 15-year follow-up study of the GAZEL cohort. *Am J Epidemiol* 2013; 178: 1712-1720.
39. Li Y, Millikan RC, Bell DA et al. Cigarette smoking, cytochrome P4501A1 polymorphisms, and breast cancer among African-American and white women. *Breast Cancer Res* 2004; 6: R460-473.
40. Marcus PM, Newman B, Millikan RC et al. The associations of adolescent cigarette smoking, alcoholic beverage consumption, environmental tobacco smoke, and ionizing radiation with subsequent breast cancer risk (United States). *Cancer Causes Control* 2000; 11: 271-278.
41. McKenzie F, Ferrari P, Freisling H et al. Healthy lifestyle and risk of breast cancer among postmenopausal women in the European Prospective Investigation into Cancer and Nutrition cohort study. *Int J Cancer* 2015; 136: 2640-2648.
42. Metsola K, Kataja V, Sillanpää P et al. XRCC1 and XPD genetic polymorphisms, smoking and breast cancer risk in a Finnish case-control study. *Breast Cancer Res* 2005; 7: R987-997.
43. Sillanpää P, Hirvonen A, Kataja V et al. NAT2 slow acetylator genotype as an important modifier of breast cancer risk. *Int J Cancer* 2005; 114: 579-584.
44. Millikan RC, Pittman GS, Newman B et al. Cigarette smoking, N-acetyltransferases 1 and 2, and breast cancer risk. *Cancer Epidemiol Biomarkers Prev* 1998; 7: 371-378.

45. Millikan RC, Player J, de Cotret AR et al. Manganese superoxide dismutase Ala-9Val polymorphism and risk of breast cancer in a population-based case-control study of African Americans and whites. *Breast Cancer Res* 2004; 6: R264-274.
46. Mitrunen K, Jourenkova N, Kataja V et al. Glutathione S-transferase M1, M3, P1, and T1 genetic polymorphisms and susceptibility to breast cancer. *Cancer Epidemiol Biomarkers Prev* 2001; 10: 229-236.
47. Mullooly M, Khodr ZG, Dallal CM et al. Epidemiologic Risk Factors for In Situ and Invasive Breast Cancers Among Postmenopausal Women in the National Institutes of Health-AARP Diet and Health Study. *Am J Epidemiol* 2017; 186: 1329-1340.
48. Pachkowski BF, Winkel S, Kubota Y et al. XRCC1 genotype and breast cancer: functional studies and epidemiologic data show interactions between XRCC1 codon 280 His and smoking. *Cancer Res* 2006; 66: 2860-2868.
49. Park SY, Palmer JR, Rosenberg L et al. A case-control analysis of smoking and breast cancer in African American women: findings from the AMBER Consortium. *Carcinogenesis* 2016; 37: 607-615.
50. Schechter MT, Miller AB, Howe GR. Cigarette smoking and breast cancer: a case-control study of screening program participants. *Am J Epidemiol* 1985; 121: 479-487.
51. Schechter MT, Miller AB, Howe GR et al. Cigarette smoking and breast cancer: case-control studies of prevalent and incident cancer in the Canadian National Breast Screening Study. *Am J Epidemiol* 1989; 130: 213-220.
52. Shankar A, Yuan JM, Koh WP et al. Morbidity and mortality in relation to smoking among women and men of Chinese ethnicity: the Singapore Chinese Health Study. *Eur J Cancer* 2008; 44: 100-109.
53. Shen J, Gammon MD, Terry MB et al. Polymorphisms in XRCC1 modify the association between polycyclic aromatic hydrocarbon-DNA adducts, cigarette smoking, dietary antioxidants, and breast cancer risk. *Cancer Epidemiol Biomarkers Prev* 2005; 14: 336-342.
54. Mordukhovich I, Rossner P, Jr., Terry MB et al. Associations between polycyclic aromatic hydrocarbon-related exposures and p53 mutations in breast tumors. *Environ Health Perspect* 2010; 118: 511-518.
55. Shen J, Terry MB, Gammon MD et al. MGMT genotype modulates the associations between cigarette smoking, dietary antioxidants and breast cancer risk. *Carcinogenesis* 2005; 26: 2131-2137.
56. Shen J, Terry MB, Gammon MD et al. IGHMBP2 Thr671Ala polymorphism might be a modifier for the effects of cigarette smoking and PAH-DNA adducts to breast cancer risk. *Breast Cancer Res Treat* 2006; 99: 1-7.
57. Tamimi RM, Hankinson SE, Spiegelman D et al. Manganese superoxide dismutase polymorphism, plasma antioxidants, cigarette smoking, and risk of breast cancer. *Cancer Epidemiol Biomarkers Prev* 2004; 13: 989-996.
58. Terry PD, Miller AB, Rohan TE. Cigarette smoking and breast cancer risk: a long latency period? *Int J Cancer* 2002; 100: 723-728.
59. Van Ryswyk K, Villeneuve PJ, Johnson KC.; Canadian Cancer Registries Epidemiology Research Group. Dietary patterns and the risk of female breast cancer among participants of the Canadian National Enhanced Cancer Surveillance System. *Can J Public Health* 2016; 107: e49-e55.
60. Johnson KC, Hu J, Mao Y, Canadian Cancer Registries Epidemiology Research Group. Passive and active smoking and breast cancer risk in Canada, 1994-97. *Cancer Causes Control* 2000; 11: 211-221.
61. White AJ, Bradshaw PT, Herring AH et al. Exposure to multiple sources of polycyclic aromatic hydrocarbons and breast cancer incidence. *Environ Int* 2016; 89-90: 185-192.
62. Williams LA, Casbas-Hernandez P, Nichols HB et al. Risk factors for Luminal A ductal carcinoma in situ (DCIS) and invasive breast cancer in the Carolina Breast Cancer Study. *PLoS One* 2019; 14: e0211488.
63. Adami HO, Lund E, Bergström R, Meirik O. Cigarette smoking, alcohol consumption and risk of breast cancer in young women. *Br J Cancer* 1988; 58: 832-837.
64. Ahern TP, Lash TL, Egan KM, Baron JA. Lifetime tobacco smoke exposure and breast cancer incidence. *Cancer Causes Control* 2009; 20: 1837-1844.



65. Alberg AJ, Daudt A, Huang HY et al. N-acetyltransferase 2 (NAT2) genotypes, cigarette smoking, and the risk of breast cancer. *Cancer Detect Prev* 2004; 28: 187-193.
66. Alim NE, Kiziltan G. Assessment of Risk Factors of Obesity and Diet on Breast Cancer in Ankara, Turkey. *Pak J Med Sci* 2016; 32: 1537-1542.
67. Alsolami FJ, Azzeah FS, Ghafouri KJ et al. Determinants of breast cancer in Saudi women from Makkah region: a case-control study (breast cancer risk factors among Saudi women). *BMC Public Health* 2019; 19: 1554.
68. Andonova IE, Justenhoven C, Winter S et al. No evidence for glutathione S-transferases GSTA2, GSTM2, GSTO1, GSTO2, and GSTZ1 in breast cancer risk. *Breast Cancer Res Treat* 2010; 121: 497-502.
69. Band PR, Le ND, Fang R, Deschamps M. Carcinogenic and endocrine disrupting effects of cigarette smoke and risk of breast cancer. *Lancet* 2002; 360: 1044-1049.
70. Bano R, Ismail M, Nadeem A et al. Potential Risk Factors for Breast Cancer in Pakistani Women. *Asian Pac J Cancer Prev* 2016; 17: 4307-4312.
71. Baron JA, Byers T, Greenberg ER et al. Cigarette smoking in women with cancers of the breast and reproductive organs. *J Natl Cancer Inst* 1986; 77: 677-680.
72. Baron JA, Newcomb PA, Longnecker MP et al. Cigarette smoking and breast cancer. *Cancer Epidemiol Biomarkers Prev* 1996; 5: 399-403.
73. Bennicke K, Conrad C, Sabroe S, Sørensen HT. Cigarette smoking and breast cancer. *BMJ* 1995; 310: 1431-1433.
74. Berrandou T, Mulot C, Cordina-Duverger E et al. Association of breast cancer risk with polymorphisms in genes involved in the metabolism of xenobiotics and interaction with tobacco smoking: A gene-set analysis. *Int J Cancer* 2019; 144: 1896-1908.
75. Bowlin SJ, Leske MC, Varma A et al. Breast cancer risk and alcohol consumption: results from a large case-control study. *Int J Epidemiol* 1997; 26: 915-923.
76. Braga C, Negri E, La Vecchia C et al. Cigarette smoking and the risk of breast cancer. *Eur J Cancer Prev* 1996; 5: 159-164.
77. Brinton LA, Schairer C, Stanford JL, Hoover RN. Cigarette smoking and breast cancer. *Am J Epidemiol* 1986; 123: 614-622.
78. Brown LM, Gridley G, Wu AH et al. Low level alcohol intake, cigarette smoking and risk of breast cancer in Asian-American women. *Breast Cancer Res Treat* 2010; 120: 203-210.
79. Brownson RC, Blackwell CW, Pearson DK et al. Risk of breast cancer in relation to cigarette smoking. *Arch Intern Med* 1988; 148: 140-144.
80. Brunet JS, Ghadirian P, Rebbeck TR et al. Effect of smoking on breast cancer in carriers of mutant BRCA1 or BRCA2 genes. *J Natl Cancer Inst* 1998; 90: 761-766.
81. Catsburg C, Kirsh VA, Soskolne CL et al. Active cigarette smoking and the risk of breast cancer: a cohort study. *Cancer Epidemiol* 2014; 38: 376-381.
82. Cerne JZ, Ferik P, Leskosek B, Gersak K. Hormone replacement therapy and some risk factors for breast cancer among Slovenian postmenopausal women. *Climacteric* 2011; 14: 458-463.
83. Chu SY, Stroup NE, Wingo PA et al. Cigarette smoking and the risk of breast cancer. *Am J Epidemiol* 1990; 131: 244-253.
84. Colilla S, Kantoff PW, Neuhausen SL et al. The joint effect of smoking and AIB1 on breast cancer risk in BRCA1 mutation carriers. *Carcinogenesis* 2006; 27: 599-605.
85. Conlon MS, Johnson KC, Bewick MA et al. Smoking (active and passive), N-acetyltransferase 2, and risk of breast cancer. *Cancer Epidemiol* 2010; 34: 142-149.
86. Connor AE, Baumgartner KB, Baumgartner RN et al. Cigarette Smoking and Breast Cancer Risk in Hispanic and Non-Hispanic White Women: The Breast Cancer Health Disparities Study. *J Womens Health (Larchmt)* 2016; 25: 299-310.
87. Cooper JA, Rohan TE, Cant EL et al. Risk factors for breast cancer by oestrogen receptor status: a population-based case-control study. *Br J Cancer* 1989; 59: 119-125.
88. Cotterchio M, Kreiger N, Theis B et al. Hormonal factors and the risk of breast cancer according to estrogen- and progesterone-receptor subgroup. *Cancer Epidemiol Biomarkers Prev* 2003; 12: 1053-1060.
89. Croghan IT, Pruthi S, Hays JT et al. The role of smoking in breast cancer development: an analysis of a Mayo Clinic cohort. *Breast J* 2009; 15: 489-495.

90. Delfino RJ, Smith C, West JG et al. Breast cancer, passive and active cigarette smoking and N-acetyltransferase 2 genotype. *Pharmacogenetics* 2000; 10: 461-469.
91. Ellingjord-Dale M, Vos L, Hjerkind KV et al. Alcohol, Physical Activity, Smoking, and Breast Cancer Subtypes in a Large, Nested Case-Control Study from the Norwegian Breast Cancer Screening Program. *Cancer Epidemiol Biomarkers Prev* 2017; 26: 1736-1744.
92. Ellingjord-Dale M, Vos L, Vik Hjerkind K et al. Number of Risky Lifestyle Behaviors and Breast Cancer Risk. *JNCI Cancer Spectr* 2018; 2: pky030.
93. Field NA, Baptiste MS, Nasca PC, Metzger BB. Cigarette smoking and breast cancer. *Int J Epidemiol* 1992; 21: 842-848.
94. Furberg H, Millikan RC, Geradts J et al. Environmental factors in relation to breast cancer characterized by p53 protein expression. *Cancer Epidemiol Biomarkers Prev* 2002; 11: 829-835.
95. Gammon MD, Hibshoosh H, Terry MB et al. Cigarette smoking and other risk factors in relation to p53 expression in breast cancer among young women. *Cancer Epidemiol Biomarkers Prev* 1999; 8: 255-263.
96. Gammon MD, Eng SM, Teitelbaum SL et al. Environmental tobacco smoke and breast cancer incidence. *Environ Res* 2004; 96: 176-185.
97. Gao CM, Ding JH, Li SP et al. Active and passive smoking, and alcohol drinking and breast cancer risk in chinese women. *Asian Pac J Cancer Prev* 2013; 14: 993-996.
98. Gaudet MM, Gammon MD, Santella RM et al. MnSOD Val-9Ala genotype, pro- and anti-oxidant environmental modifiers, and breast cancer among women on Long Island, New York. *Cancer Causes Control* 2005; 16: 1225-1234.
99. Gibson LJ, Héry C, Mitton N et al. Risk factors for breast cancer among Filipino women in Manila. *Int J Cancer* 2010; 126: 515-521.
100. Godinho-Mota JCM, Gonçalves LV, Mota JF et al. Sedentary Behavior and Alcohol Consumption Increase Breast Cancer Risk Regardless of Menopausal Status: A Case-Control Study. *Nutrients* 2019; 11.
101. Gronwald J, Byrski T, Huzarski T et al. Influence of selected lifestyle factors on breast and ovarian cancer risk in BRCA1 mutation carriers from Poland. *Breast Cancer Res Treat* 2006; 95: 105-109.
102. Hamajima N, Hirose K, Tajima K et al.; Collaborative Group on Hormonal Factors in Breast Cancer. Alcohol, tobacco and breast cancer--collaborative reanalysis of individual data from 53 epidemiological studies, including 58,515 women with breast cancer and 95,067 women without the disease. *Br J Cancer* 2002; 87: 1234-1245.
103. Hara A, Taira N, Mizoo T et al. N-acetyltransferase 2 polymorphism and breast cancer risk with smoking: a case control study in Japanese women. *Breast Cancer* 2017; 24: 254-262.
104. Hiatt RA, Klatsky AL, Armstrong MA. Alcohol consumption and the risk of breast cancer in a prepaid health plan. *Cancer Res* 1988; 48: 2284-2287.
105. Hsieh YC, Lee CH, Tu SH et al. CHRNA9 polymorphisms and smoking exposure synergize to increase the risk of breast cancer in Taiwan. *Carcinogenesis* 2014; 35: 2520-2525.
106. Huang CS, Shen CY, Chang KJ et al. Cytochrome P4501A1 polymorphism as a susceptibility factor for breast cancer in postmenopausal Chinese women in Taiwan. *Br J Cancer* 1999; 80: 1838-1843.
107. Huang WY, Newman B, Millikan RC et al. Hormone-related factors and risk of breast cancer in relation to estrogen receptor and progesterone receptor status. *Am J Epidemiol* 2000; 151: 703-714.
108. Hunter DJ, Hankinson SE, Hough H et al. A prospective study of NAT2 acetylation genotype, cigarette smoking, and risk of breast cancer. *Carcinogenesis* 1997; 18: 2127-2132.
109. Ilic M, Vlajinac H, Marinkovic J. Cigarette smoking and breast cancer: a case-control study in Serbia. *Asian Pac J Cancer Prev* 2014; 14: 6643-6647.
110. Kato I, Miura S, Kasumi F et al. A case-control study of breast cancer among Japanese women: with special reference to family history and reproductive and dietary factors. *Breast Cancer Res Treat* 1992; 24: 51-59.
111. Krajcinovic M, Ghadirian P, Richer C et al. Genetic susceptibility to breast cancer in French-Canadians: role of carcinogen-metabolizing enzymes and gene-environment interactions. *Int J Cancer* 2001; 92: 220-225.

112. Kropp S, Chang-Claude J. Active and passive smoking and risk of breast cancer by age 50 years among German women. *Am J Epidemiol* 2002; 156: 616-626.
113. Kruk J. Association of lifestyle and other risk factors with breast cancer according to menopausal status: a case-control study in the Region of Western Pomerania (Poland). *Asian Pac J Cancer Prev* 2007; 8: 513-524.
114. Lash TL, Aschengrau A. Active and passive cigarette smoking and the occurrence of breast cancer. *Am J Epidemiol* 1999; 149: 5-12.
115. Lash TL, Aschengrau A. A null association between active or passive cigarette smoking and breast cancer risk. *Breast Cancer Res Treat* 2002; 75: 181-184.
116. Li CI, Malone KE, Daling JR. The relationship between various measures of cigarette smoking and risk of breast cancer among older women 65-79 years of age (United States). *Cancer Causes Control* 2005; 16: 975-985.
117. Lilla C, Risch A, Kropp S, Chang-Claude J. SULT1A1 genotype, active and passive smoking, and breast cancer risk by age 50 years in a German case-control study. *Breast Cancer Res* 2005; 7: R229-237.
118. Lissowska J, Brinton LA, Zatonski W et al. Tobacco smoking, NAT2 acetylation genotype and breast cancer risk. *Int J Cancer* 2006; 119: 1961-1969.
119. Magnusson C, Wedrén S, Rosenberg LU. Cigarette smoking and breast cancer risk: a population-based study in Sweden. *Br J Cancer* 2007; 97: 1287-1290.
120. Manjer J, Johansson R, Lenner P. Smoking is associated with postmenopausal breast cancer in women with high levels of estrogens. *Int J Cancer* 2004; 112: 324-328.
121. Martin-Moreno JM, Boyle P, Gorgojo L et al. Alcoholic beverage consumption and risk of breast cancer in Spain. *Cancer Causes Control* 1993; 4: 345-353.
122. McCredie MR, Dite GS, Giles GG, Hopper JL. Breast cancer in Australian women under the age of 40. *Cancer Causes Control* 1998; 9: 189-198.
123. McTiernan A, Thomas DB, Johnson LK, Roseman D. Risk factors for estrogen receptor-rich and estrogen receptor-poor breast cancers. *J Natl Cancer Inst* 1986; 77: 849-854.
124. Meara J, McPherson K, Roberts M et al. Alcohol, cigarette smoking and breast cancer. *Br J Cancer* 1989; 60: 70-73.
125. Millikan R, Pittman G, Tse CK et al. Glutathione S-transferases M1, T1, and P1 and breast cancer. *Cancer Epidemiol Biomarkers Prev* 2000; 9: 567-573.
126. Morabia A, Bernstein M, Héritier S, Khatchatrian N. Relation of breast cancer with passive and active exposure to tobacco smoke. *Am J Epidemiol* 1996; 143: 918-928.
127. Morabia A, Bernstein M, Ruiz J et al. Relation of smoking to breast cancer by estrogen receptor status. *Int J Cancer* 1998; 75: 339-342.
128. Morabia A, Bernstein MS, Bouchardy I et al. Breast cancer and active and passive smoking: the role of the N-acetyltransferase 2 genotype. *Am J Epidemiol* 2000; 152: 226-232.
129. Nishino Y, Minami Y, Kawai M et al. Cigarette smoking and breast cancer risk in relation to joint estrogen and progesterone receptor status: a case-control study in Japan. *Springerplus* 2014; 3: 65.
130. O'Connell DL, Hulka BS, Chambless LE et al. Cigarette smoking, alcohol consumption, and breast cancer risk. *J Natl Cancer Inst* 1987; 78: 229-234.
131. Ozmen V, Ozcinar B, Karanlik H et al. Breast cancer risk factors in Turkish women--a University Hospital based nested case control study. *World J Surg Oncol* 2009; 7: 37.
132. Palmer JR, Rosenberg L, Clarke EA et al. Breast cancer and cigarette smoking: a hypothesis. *Am J Epidemiol* 1991; 134: 1-13.
133. Pawlega J. Breast cancer and smoking, vodka drinking and dietary habits. A case-control study. *Acta Oncol* 1992; 31: 387-392.
134. Pięta B, Chmaj-Wierzchowska K, Opala T. Life style and risk of development of breast and ovarian cancer. *Ann Agric Environ Med* 2012; 19: 379-384.
135. Pimhanam C, Sangrajrang S, Ekpanyaskul C. Tobacco smoke exposure and breast cancer risk in Thai urban females. *Asian Pac J Cancer Prev* 2014; 15: 7407-7411.
136. Plagens-Rotman K, Piskorz-Szymendera M, Chmaj-Wierzchowska K, Pieta B. Breast cancer - Analysis of the selected risk factors. *Eur J Gynaecol Oncol* 2017; 38: 425-430.
137. Pongsavee M, Wisuwan K. ERCC5 rs751402 polymorphism is the risk factor for sporadic breast cancer in Thailand. *Int J Mol Epidemiol Genet* 2018; 9: 27-33.

138. Prescott J, Ma H, Bernstein L, Ursin G. Cigarette smoking is not associated with breast cancer risk in young women. *Cancer Epidemiol Biomarkers Prev* 2007; 16: 620-622.
139. Rabstein S, Brüning T, Harth V et al.; GENICA Network. N-acetyltransferase 2, exposure to aromatic and heterocyclic amines, and receptor-defined breast cancer. *Eur J Cancer Prev* 2010; 19: 100-109.
140. Rajaei M, Omidvari S, Saadat M. Influence of smoking habit on age at diagnosis of breast cancer. *Serbian Journal of Experimental and Clinical Research* 2015; 16: 213-216.
141. Ranstam J, Olsson H. Alcohol, cigarette smoking, and the risk of breast cancer. *Cancer Detect Prev* 1995; 19: 487-493.
142. Rautalahti M, Albanes D, Virtamo J et al. Lifetime menstrual activity--indicator of breast cancer risk. *Eur J Epidemiol* 1993; 9: 17-25.
143. Richardson S, de Vincenzi I, Pujol H, Gerber M. Alcohol consumption in a case-control study of breast cancer in southern France. *Int J Cancer* 1989; 44: 84-89.
144. Roddam AW, Pirie K, Pike MC et al. Active and passive smoking and the risk of breast cancer in women aged 36-45 years: a population based case-control study in the UK. *Br J Cancer* 2007; 97: 434-439.
145. Rohan TE, Baron JA. Cigarette smoking and breast cancer. *Am J Epidemiol* 1989; 129: 36-42.
146. Rollison DE, Brownson RC, Hathcock HL, Newschaffer CJ. Case-control study of tobacco smoke exposure and breast cancer risk in Delaware. *BMC Cancer* 2008; 8: 157.
147. Rusczyk M, Zirpoli G, Kumar S et al. Breast cancer risk factor associations differ for pure versus invasive carcinoma with an in situ component in case-control and case-case analyses. *Cancer Causes Control* 2016; 27: 183-198.
148. Shore RE, Zeleniuch-Jacquotte A, Currie D et al. Polymorphisms in XPC and ERCC2 genes, smoking and breast cancer risk. *Int J Cancer* 2008; 122: 2101-2105.
149. Slattery ML, Curtin K, Giuliano AR et al. Active and passive smoking, IL6, ESR1, and breast cancer risk. *Breast Cancer Res Treat* 2008; 109: 101-111.
150. Smith SJ, Deacon JM, Chilvers CE. Alcohol, smoking, passive smoking and caffeine in relation to breast cancer risk in young women. UK National Case-Control Study Group. *Br J Cancer* 1994; 70: 112-119.
151. Stanford JL, Szklo M, Boring CC et al. A case-control study of breast cancer stratified by estrogen receptor status. *Am J Epidemiol* 1987; 125: 184-194.
152. Trivers KF, Lund MJ, Porter PL et al. The epidemiology of triple-negative breast cancer, including race. *Cancer Causes Control* 2009; 20: 1071-1082.
153. Tung HT, Tsukuma H, Tanaka H et al. Risk factors for breast cancer in Japan, with special attention to anthropometric measurements and reproductive history. *Jpn J Clin Oncol.* 1999; 29: 137-146.
154. Ueji M, Ueno E, Hyiaman DO et al. Risk Factors for Breast Cancer among Japanese Women: A Case-Control Study in Ibaraki, Japan. *Breast Cancer* 1998; 5: 351-358.
155. van der Hel OL, Peeters PH, Hein DW et al. NAT2 slow acetylation and GSTM1 null genotypes may increase postmenopausal breast cancer risk in long-term smoking women. *Pharmacogenetics* 2003; 13: 399-407.
156. van der Hel OL, Bueno-de-Mesquita HB, van Gils CH et al. Cumulative genetic defects in carcinogen metabolism may increase breast cancer risk (The Netherlands). *Cancer Causes Control* 2005; 16: 675-681.
157. Viladiu P, Izquierdo A, de Sanjosé S, Bosch FX. A breast cancer case-control study in Girona, Spain. Endocrine, familial and lifestyle factors. *Eur J Cancer Prev* 1996; 5: 329-335.
158. Wakai K, Ohno Y, Watanabe S et al. Risk Factors for Breast Cancer among Japanese Women in Tokyo : A Case-Control Study. *J Epidemiol* 1994; 4: 65-71.
159. Wang Q, Li H, Tao P et al. Soy isoflavones, CYP1A1, CYP1B1, and COMT polymorphisms, and breast cancer: a case-control study in southwestern China. *DNA Cell Biol* 2011; 30: 585-595.
160. White E, Malone KE, Weiss NS, Daling JR. Breast cancer among young U.S. women in relation to oral contraceptive use. *J Natl Cancer Inst* 1994; 86: 505-514.
161. Yang PS, Yang TL, Liu CL et al. A case-control study of breast cancer in Taiwan--a low-incidence area. *Br J Cancer* 1997; 75: 752-756.

162. Yoo KY, Tajima K, Miura S et al. Breast cancer risk factors according to combined estrogen and progesterone receptor status: a case-control analysis. *Am J Epidemiol* 1997; 146: 307-314.
163. Young E, Leatherdale S, Sloan M et al. Age of smoking initiation and risk of breast cancer in a sample of Ontario women. *Tob Induc Dis* 2009; 5: 4.
164. Yuan JM, Yu MC, Ross RK et al. Risk factors for breast cancer in Chinese women in Shanghai. *Cancer Res* 1988; 48: 1949-1953.
165. Zheng W, Deitz AC, Campbell DR et al. N-acetyltransferase 1 genetic polymorphism, cigarette smoking, well-done meat intake, and breast cancer risk. *Cancer Epidemiol Biomarkers Prev* 1999; 8: 233-239.
166. Zheng T, Holford TR, Zahm SH et al. Cigarette smoking, glutathione-s-transferase M1 and t1 genetic polymorphisms, and breast cancer risk (United States). *Cancer Causes Control* 2002; 13: 637-645.
167. Zheng H, Song F, Zhang L et al. Genetic variants at the miR-124 binding site on the cytoskeleton-organizing IQGAP1 gene confer differential predisposition to breast cancer. *Int J Oncol* 2011; 38: 1153-1161.
168. Akiba S, Hirayama T. Cigarette smoking and cancer mortality risk in Japanese men and women--results from reanalysis of the six-prefecture cohort study data. *Environ Health Perspect* 1990; 87: 19-26.
169. Al-Delaimy WK, Cho E, Chen WY et al. A prospective study of smoking and risk of breast cancer in young adult women. *Cancer Epidemiol Biomarkers Prev* 2004; 13: 398-404.
170. Arthur R, Wassertheil-Smoller S, Manson JE et al. The Combined Association of Modifiable Risk Factors with Breast Cancer Risk in the Women's Health Initiative. *Cancer Prev Res (Phila)* 2018; 11: 317-326.
171. Arthur RS, Wang T, Xue X et al. Genetic factors, adherence to healthy lifestyle behavior, and risk of invasive breast cancer among women in the UK Biobank. *J Natl Cancer Inst* 2020; 112(9):893-901.
172. Blakely T, Barendregt JJ, Foster RH et al. The association of active smoking with multiple cancers: national census-cancer registry cohorts with quantitative bias analysis. *Cancer Causes Control* 2013; 24: 1243-1255.
173. Calle EE, Miracle-McMahill HL, Thun MJ, Heath CW, Jr. Cigarette smoking and risk of fatal breast cancer. *Am J Epidemiol* 1994; 139: 1001-1007.
174. Carter BD, Abnet CC, Feskanich D et al. Smoking and mortality--beyond established causes. *N Engl J Med* 2015; 372: 631-640.
175. Coleman NC, Burnett RT, Higbee JD et al. Cancer mortality risk, fine particulate air pollution, and smoking in a large, representative cohort of US adults. *Cancer Causes Control* 2020; 31(8):767-776.
176. Engeland A, Andersen A, Haldorsen T, Tretli S. Smoking habits and risk of cancers other than lung cancer: 28 years' follow-up of 26,000 Norwegian men and women. *Cancer Causes Control* 1996; 7: 497-506.
177. Gaudet MM, Gapstur SM, Sun J et al. Active smoking and breast cancer risk: original cohort data and meta-analysis. *J Natl Cancer Inst* 2013; 105: 515-525.
178. Goodman MT, Cologne JB, Moriwaki H et al. Risk factors for primary breast cancer in Japan: 8-year follow-up of atomic bomb survivors. *Prev Med* 1997; 26: 144-153.
179. Gram IT, Braaten T, Terry PD et al. Breast cancer risk among women who start smoking as teenagers. *Cancer Epidemiol Biomarkers Prev* 2005; 14: 61-66.
180. Gram IT, Park SY, Kolonel LN et al. Smoking and Risk of Breast Cancer in a Racially/Ethnically Diverse Population of Mainly Women Who Do Not Drink Alcohol: The MEC Study. *Am J Epidemiol* 2015; 182: 917-925.
181. Gram IT, Park SY, Maskarinec G et al. Smoking and breast cancer risk by race/ethnicity and oestrogen and progesterone receptor status: the Multiethnic Cohort (MEC) study. *Int J Epidemiol* 2019; 48: 501-511.
182. Hanaoka T, Yamamoto S, Sobue T et al; Japan Public Health Center-Based Prospective Study on Cancer and Cardiovascular Disease Study Group. Active and passive smoking and breast cancer risk in middle-aged Japanese women. *Int J Cancer* 2005; 114: 317-322.
183. Hiatt RA, Fireman BH. Smoking, menopause, and breast cancer. *J Natl Cancer Inst* 1986; 76: 833-838.

184. Jacob L, Freyn M, Kalder M et al. Impact of tobacco smoking on the risk of developing 25 different cancers in the UK: a retrospective study of 422,010 patients followed for up to 30 years. *Oncotarget* 2018; 9: 17420-17429.
185. Jee SH, Samet JM, Ohrr H et al. Smoking and cancer risk in Korean men and women. *Cancer Causes Control* 2004; 15: 341-348.
186. Jones ME, Schoemaker MJ, Wright LB et al. Smoking and risk of breast cancer in the Generations Study cohort. *Breast Cancer Res* 2017; 19: 118.
187. Ko KP, Kim SJ, Huzarski T et al.; Hereditary Breast Cancer Clinical Study Group. The association between smoking and cancer incidence in BRCA1 and BRCA2 mutation carriers. *Int J Cancer* 2018; 142: 2263-2272.
188. Land SR, Liu Q, Wickerham DL et al. Cigarette smoking, physical activity, and alcohol consumption as predictors of cancer incidence among women at high risk of breast cancer in the NSABP P-1 trial. *Cancer Epidemiol Biomarkers Prev* 2014; 23: 823-832.
189. Lin Y, Kikuchi S, Tamakoshi K et al.; Japan Collaborative Cohort Study Group for Evaluation of Cancer Risk. Active smoking, passive smoking, and breast cancer risk: findings from the Japan Collaborative Cohort Study for Evaluation of Cancer Risk. *J Epidemiol* 2008; 18: 77-83.
190. London SJ, Colditz GA, Stampfer MJ et al. Prospective study of smoking and the risk of breast cancer. *J Natl Cancer Inst* 1989; 81: 1625-1631.
191. Luo J, Margolis KL, Wactawski-Wende J et al. Association of active and passive smoking with risk of breast cancer among postmenopausal women: a prospective cohort study. *BMJ* 2011; 342: d1016.
192. Manjer J, Berglund G, Bondesson L et al. Breast cancer incidence in relation to smoking cessation. *Breast Cancer Res Treat* 2000; 61: 121-129.
193. Manjer J, Malina J, Berglund G et al. Smoking associated with hormone receptor negative breast cancer. *Int J Cancer* 2001; 91: 580-584.
194. Meyer J, Rohrmann S, Bopp M et al.; Swiss National Cohort Study Group. Impact of Smoking and Excess Body Weight on Overall and Site-Specific Cancer Mortality Risk. *Cancer Epidemiol Biomarkers Prev* 2015; 24: 1516-1522.
195. Nordlund LA, Carstensen JM, Pershagen G. Cancer incidence in female smokers: a 26-year follow-up. *Int J Cancer* 1997; 73: 625-628.
196. Nyante SJ, Gierach GL, Dallal CM et al. Cigarette smoking and postmenopausal breast cancer risk in a prospective cohort. *Br J Cancer* 2014; 110: 2339-2347.
197. Olson JE, Vachon CM, Vierkant RA et al. Prepregnancy exposure to cigarette smoking and subsequent risk of postmenopausal breast cancer. *Mayo Clin Proc* 2005; 80: 1423-1428.
198. Ozasa K, Japan Collaborative Cohort Study for Evaluation of Cancer. Smoking and mortality in the Japan Collaborative Cohort Study for Evaluation of Cancer (JACC). *Asian Pac J Cancer Prev* 2007; 8 Suppl: 89-96.
199. Park B, Lim SE, Ahn H et al. Heterogenous Effect of Risk Factors on Breast Cancer across the Breast Density Categories in a Korean Screening Population. *Cancers (Basel)* 2020; 12.
200. Pirie K, Peto R, Reeves GK et al.; Million Women Study Collaborators. The 21st century hazards of smoking and benefits of stopping: a prospective study of one million women in the UK. *Lancet* 2013; 381: 133-141.
201. Reynolds P, Hurley S, Goldberg DE et al. Active smoking, household passive smoking, and breast cancer: evidence from the California Teachers Study. *J Natl Cancer Inst* 2004; 96: 29-37.
202. Rosenberg L, Boggs DA, Bethea TN et al. A prospective study of smoking and breast cancer risk among African-American women. *Cancer Causes Control* 2013; 24: 2207-2215.
203. Schatzkin A, Carter CL, Green SB et al. Is alcohol consumption related to breast cancer? Results from the Framingham Heart Study. *J Natl Cancer Inst* 1989; 81: 31-35.
204. Swift M, Lukin JL. Breast cancer incidence and the effect of cigarette smoking in heterozygous carriers of mutations in the ataxia-telangiectasia gene. *Cancer Epidemiol Biomarkers Prev* 2008; 17: 3188-3192.
205. Taghizadeh N, Vonk JM, Boezen HM. Lifetime Smoking History and Cause-Specific Mortality in a Cohort Study with 43 Years of Follow-Up. *PLoS One* 2016; 11: e0153310.
206. Tverdal A, Thelle D, Stensvold I et al. Mortality in relation to smoking history: 13 years' follow-up of 68,000 Norwegian men and women 35-49 years. *J Clin Epidemiol* 1993; 46: 475-487.

207. van den Brandt PA. A possible dual effect of cigarette smoking on the risk of postmenopausal breast cancer. *Eur J Epidemiol* 2017; 32: 683-690.
208. Viner B, Barberio AM, Haig TR et al. The individual and combined effects of alcohol consumption and cigarette smoking on site-specific cancer risk in a prospective cohort of 26,607 adults: results from Alberta's Tomorrow Project. *Cancer Causes Control* 2019; 30: 1313-1326.
209. Wada K, Kawachi T, Hori A et al. Husband's smoking status and breast cancer risk in Japan: From the Takayama study. *Cancer Sci* 2015; 106: 455-460.
210. White AJ, D'Aloisio AA, Nichols HB et al. Breast cancer and exposure to tobacco smoke during potential windows of susceptibility. *Cancer Causes Control* 2017; 28: 667-675.
211. Zheng W, McLerran DF, Rolland BA et al. Burden of total and cause-specific mortality related to tobacco smoking among adults aged  $\geq 45$  years in Asia: a pooled analysis of 21 cohorts. *PLoS Med* 2014; 11: e1001631.
